1 **Strong preference for autaptic self-connectivity of neocortical PV interneurons**  
2 **entrains them to  $\gamma$ -oscillations**

3

4 Charlotte Deleuze<sup>1</sup>, Gary S. Bhumbra<sup>2</sup>, Antonio Pazienti<sup>3</sup>, Caroline Mailhes<sup>1</sup>, Andrea Aguirre<sup>1</sup>, Marco  
5 Beato<sup>2\*</sup> and Alberto Bacci<sup>1\*</sup>

6

7 <sup>1</sup>ICM–Institut du Cerveau et de la Moelle épinière, Inserm U1127; CNRS UMR 7225; Sorbonne  
8 Université, 75013 Paris France;

9 <sup>2</sup>Department of Neuroscience, Physiology and Pharmacology, UCL, Gower St., London WC1E 6BT, UK

10 <sup>3</sup>European Brain Research Institute, via del Fosso di Fiorano 64, 00143 Rome, Italy

11

12 \*Co-senior and co-corresponding authors: [alberto.bacci@icm-institute.org](mailto:alberto.bacci@icm-institute.org); [m.beato@ucl.ac.uk](mailto:m.beato@ucl.ac.uk)

13

14 Keywords: Cerebral cortex, PV cells, autapses, synaptic transmission, inhibition,  $\gamma$ -oscillations

15

16

## 17 **Summary**

18           Parvalbumin (PV) positive interneurons modulate cortical activity through highly specialized  
19 connectivity patterns onto excitatory pyramidal neurons (PNs) and other inhibitory cells. PV cells are  
20 auto-connected through powerful autapses, but the contribution of this form of fast disinhibition to  
21 cortical function is unknown. We found that autaptic transmission represents the most powerful input  
22 of PV cells in neocortical Layer V. Autaptic strength was greater than synaptic strength onto PNs as  
23 result of a larger quantal size, whereas autaptic and heterosynaptic PV-PV synapses differed in the  
24 number of release sites. Overall, single-axon autaptic transmission contributed to ~40% of the total  
25 perisomatic inhibition that PV interneurons received. The strength of autaptic transmission modulated  
26 the coupling of PV-cell firing with optogenetically-induced  $\gamma$ -oscillations preventing high frequency  
27 bursts of spikes. Autaptic self-inhibition represents an exceptionally large and fast disinhibitory  
28 mechanism to synchronize the output of PV cells during cognitive-relevant cortical network activity.

## 30 **Introduction**

31           In the neocortex, cognitive-relevant processes depend on the activity of intricate networks  
32 formed by specific excitatory and inhibitory neuronal populations that are inter-connected according  
33 to a detailed blueprint (Allene et al., 2015; Harris and Shepherd, 2015; Kepecs and Fishell,  
34 2014; Tremblay et al., 2016). In particular, fast synaptic inhibition governs both spontaneous and  
35 sensory-evoked cortical activity, and originates from a rich diversity of cell types with precisely distinct  
36 functions within cortical circuits (Isaacson and Scanziani, 2011; Tremblay et al., 2016). Perisomatic-  
37 targeting parvalbumin (PV)-expressing basket cells represent a major population of cortical GABAergic  
38 neurons. By providing fast inhibition onto PN cell bodies, PV cells exert a fine control of their output  
39 gain (Atallah et al., 2012; Tremblay et al., 2016) and spike timing, resulting in the generation and  
40 modulation of  $\gamma$ -rhythms, important for sensory perception and attention (Bartos et al., 2007; Buzsaki  
41 and Wang, 2012; Cardin et al., 2009; Sohal et al., 2009). Indeed, in awake animals, PV cells fire trains of

42 spikes, which are strongly phase-locked to both spontaneous and visually evoked  $\gamma$ -rhythmic activity  
43 (Perrenoud et al., 2016).

44 In addition to targeting PNs, PV cells strongly inhibit one another, and GABAergic connections  
45 between PV cells contribute the greatest inhibition of this interneuron type (Avermann et al.,  
46 2012;Pfeffer et al., 2013). Moreover, PV cells are self-connected by autapses (synapses that a neuron  
47 makes with itself (Van der Loos and Glaser, 1972)). Self-inhibition was first described anatomically in  
48 adult neocortex of the cat (Tamas et al., 1997), and it was demonstrated to be functional in rodent  
49 (Bacci et al., 2003;Bacci and Huguenard, 2006;Connelly and Lees, 2010;Deleuze et al., 2014;Manseau  
50 et al., 2010) and human neocortex (Jiang et al., 2012;Jiang et al., 2013). In particular, fast autaptic  
51 neurotransmission plays a crucial role in setting millisecond-precise spike timing of PV cells during  
52 trains of action potentials (Bacci and Huguenard, 2006). Moreover, high-frequency firing of PV cells  
53 triggers massive asynchronous autaptic release of GABA, resulting in prolonged PV-cell self-inhibition  
54 that desynchronizes PV cell firing (Jiang et al., 2013;Manseau et al., 2010) (Jiang et al., 2012).

55 Connections between PV cells form a specific inhibitory network that is important for  
56 synchronizing a large population of neurons during  $\gamma$ -oscillations (Bartos et al., 2007;Buzsaki and Silva,  
57 2012;Buzsaki and Wang, 2012). Despite the known role of PV cells as the clockwork of cortical  
58 networks, the underlying mechanism is still poorly understood. In addition, although functional  
59 autaptic transmission was demonstrated, the actual proportion of self-connections in relation to other  
60 synaptic projections from neocortical PV cells to other cells is unknown. Are autapses solely a  
61 connectivity curiosity, or do they represent an important source of inhibition of PV cells? Could fast  
62 self-inhibition contribute in keeping PV cell firing in sync with rhythmic network activity?

63 Here we measured the strength of autaptic self-inhibition compared to synaptic transmission  
64 from the same PV cell onto their two principal synaptic targets: PNs and other PV cells. Remarkably,  
65 autaptic responses were invariably much larger than unitary synaptic transmission onto PNs, and, on  
66 average, onto other PV cells. Quantal parameters underlying the autaptic vs. synaptic strength were  
67 different depending on whether the postsynaptic neuron was a PN or another PV cell. We found that

68 PV cells with strong autaptic inhibition provided little input to other PV cells, while PV cells with smaller  
69 autapses provided larger heterosynaptic inhibition to neighboring PV cells. Remarkably, self-  
70 connections accounted for up to ~40% of the entire inhibitory strength onto single PV cells. Finally,  
71 we found that autaptic transmission tuned the strong coupling of PV-cell spikes with  $\gamma$ -oscillations, by  
72 modulating spike after-hyperpolarization (AHP) and thus inter-spike intervals. Therefore, autaptic self-  
73 innervation accounts for a large fraction of synaptic inhibition PV cells receive, and is responsible for  
74 locking their spiking activity to cognitive-relevant network oscillations.

75

## 76 **Results**

77 **Layer V PV cells connect more powerfully with themselves via autaptic contacts than with other**  
78 **synaptic partners.**

79 In order to compare autaptic inhibition of PVs cells with the synaptic inhibition from the same  
80 PV cells through GABAergic connections onto PNs and other PV cells, we performed simultaneous  
81 paired recordings between these two cell types in neocortical Layer V of the mouse somatosensory  
82 (barrel) cortex of acute brain slices. We used a transgenic PV-cre::tdTomato mouse strain to identify  
83 PV cells unambiguously (see Methods). Briefly, tdTomato-positive neurons exhibit a clear multipolar,  
84 aspiny morphology and stereotypical fast-spiking behavior. Non-fluorescent PNs had typical large cell  
85 bodies and an apical dendrite directed towards the pia (see Methods). We isolated GABAergic events  
86 pharmacologically, and used a high-Cl intracellular solution (see Methods) for voltage-clamp  
87 recordings of GABAergic synaptic currents that were inward at a holding potential of -80 mV. We  
88 elicited action currents in PV cells in voltage-clamp by delivering brief (0.2 - 0.6 ms) depolarizing steps  
89 from -80 mV to membrane potential between -20 mV to 0 mV in order to minimize passive electrical  
90 artefacts induced by the stimulus. Self-connected PV cells exhibited large GABAergic inward responses  
91 following action currents. As previously demonstrated (Bacci et al., 2003), this response results from  
92 unitary autaptic transmission, since it exhibits fixed latencies, peak amplitude functions, and were  
93 abolished by the GABA<sub>A</sub>R antagonist gabazine (10  $\mu$ M, Fig. 1A). We found GABAergic autaptic

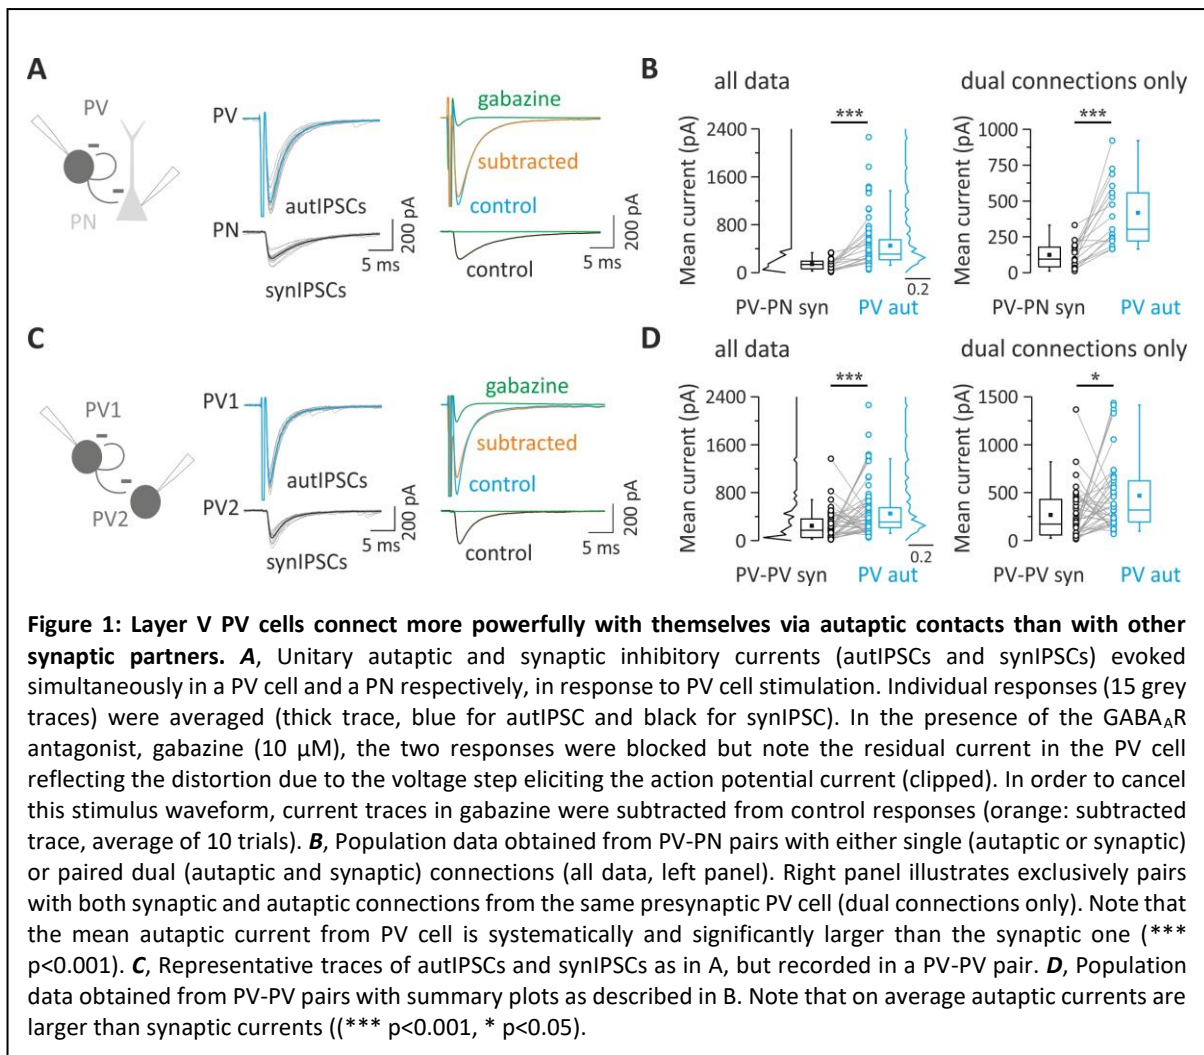

94 inhibitory postsynaptic currents (autIPSCs) in 74% of recorded PV neurons (n = 164). The same action  
 95 currents in PV cells elicited unitary inhibitory postsynaptic currents (synIPSCs) onto a fraction of PNs  
 96 (Fig. 1A,B) or PV cells (Fig. 1C,D). The yield of finding connected PV-PN pairs was of 61% (36 out of 59  
 97 pairs), of which 75% exhibited also autaptic responses (27 out of 36 pairs). We found that PV-PN  
 98 responses were invariably much smaller than their autaptic counterparts, either when they were  
 99 analyzed independently (Table 1;  $p = 5.6E-7$ , n = 84 and 22 for autaptic and synaptic transmission,  
 100 respectively), or when paired dual connections were analyzed separately (Table 2;  $p = 5.3E-4$ , n = 16;  
 101 Fig. 1B). Among pairs between PV cells, the proportion of connected synaptic PV-PV pairs was 61% (59  
 102 out of 96 pairs), of which 76% exhibited also autaptic responses (45 out of 59 pairs). Also in this case,  
 103 PV-cell autaptic strength was larger than PV-PV synaptic transmission (Table 1;  $p = 5.7E-5$ , n = 84 and  
 104 49 for autaptic and synaptic transmission, respectively), both when autIPSCs and synIPSCs were

105 analyzed independently, and when paired dual connections were analyzed separately (Table 2;  $p =$   
106 0.0215,  $n = 38$ ; Fig. 1D).

107 These results indicate that autaptic self-inhibition of PV cells is more powerful than synaptic  
108 transmission from the same PV cells onto their principal post-synaptic targets in Layer V: PNs and  
109 other PV cells.

110

111 **Quantal parameters accounting for larger unitary autaptic than synaptic connections between PV**  
112 **cells and PNs.**

113 Synaptic efficacy results from the combination of pre- and postsynaptic factors, namely the  
114 number of presynaptic release sites ( $n$ ), the probability of neurotransmitter release ( $P_r$ ), and the  
115 postsynaptic response to a single released synaptic vesicle (or quantum), known as quantal size ( $q$ ).  
116 This can be summarized by expressing the average unitary synaptic current  $\langle I_{syn} \rangle$  as a product of the  
117 quantal parameters:

118

$$119 \quad \langle I_{syn} \rangle = n P_r q$$

120

121 Autaptic self-inhibition onto PV cells is powerful and, on average, stronger than synaptic transmission  
122 from the same cells to other elements of cortical microcircuit (Fig. 1). We therefore set out to  
123 determine the quantal parameter(s), responsible for stronger autaptic neurotransmission using  
124 Bayesian quantal analysis (BQA) (Bhumbra and Beato, 2013). We recorded from pairs of PV cells and  
125 PNs, exhibiting GABAergic autaptic and synaptic responses, at two extracellular  $Ca^{2+}$  concentrations  
126 (2.0 and 1.5 mM), resulting in different release probabilities. At the end of each recording, we applied  
127 the GABA<sub>A</sub>R antagonist gabazine to enable subtraction of the stimulus waveform and action current  
128 to isolate autaptic responses for each of the  $Ca^{2+}$  concentrations (Fig 2A). Also in this set of data,  
129 autIPSCs recorded with high  $[Ca^{2+}]$  (2 mM) were invariably larger than synIPSCS (mean current =

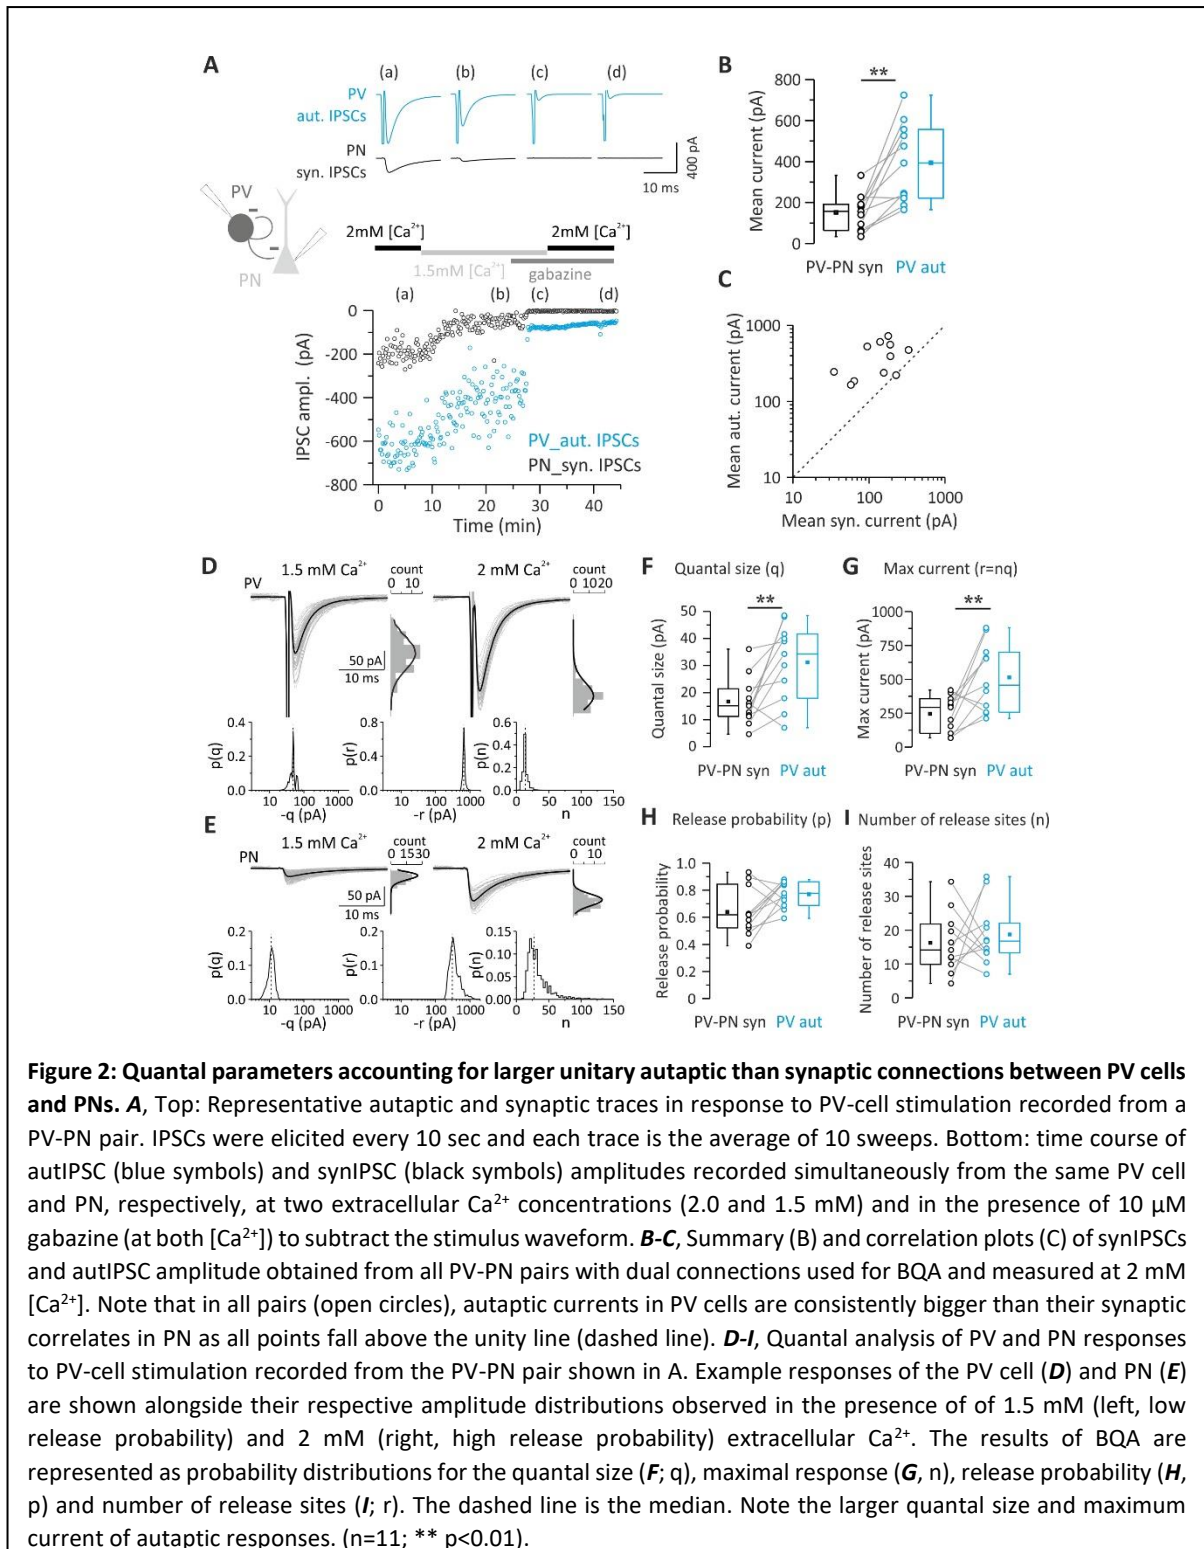

130  $394.15 \pm 58.54$  vs.  $151.64 \pm 26.24$  pA; autaptic vs. synaptic connections;  $p = 0.002$ ,  $n = 11$ ; Fig. 2B,C).

131 We then applied BQA at unitary autaptic and synaptic responses recorded at low ( $[Ca^{2+}] = 1.5$  mM)

132 and high ( $[Ca^{2+}] = 2$  mM) release probabilities, and obtained median-based estimates for the quantal

133 parameters from the marginal posterior distributions for the quantal size  $q$  and maximal response  $r$   
134 (where  $r = nq$ ), and hence number of release sites  $n$  (Fig. 2 D, E) (Bhumbra and Beato, 2013).

135 We found that in PV-PN pairs with both autaptic and synaptic connections, autaptic responses  
136 had a significant larger quantal size ( $q$ ) than unitary synaptic connections onto PNs (Table 3;  $p =$   
137  $0.00976$ ,  $n = 11$ ; Fig. 2F). Accordingly, the maximal response  $r$  ( $nq$ ) was also larger in autaptic vs.  
138 synaptic responses onto PNs (Table 3;  $p = 0.0098$ ,  $n = 11$ ; Fig. 2G). Conversely, no differences in release  
139 probability ( $P_r$ ) and number of release sites ( $n$ ) were shown by comparison of autaptic transmission  
140 onto PV cells and synaptic inhibition from the same neurons onto PNs (Table 3;  $p > 0.05$   $n = 11$ ; Fig. 2H-  
141 I).

142 These results indicate a larger quantal size at autaptic sites, as compared to synapses that the  
143 same PV cells formed with PNs. This is consistent with PV-PN synaptic transmission being invariably  
144 smaller than autaptic transmission. Therefore stronger autaptic efficacy is likely due to cell type-  
145 specific postsynaptic mechanisms.

146

#### 147 **The strength of autaptic and synaptic transmission onto PV cells depends on different number of** 148 **release sites**

149 Pairs of PV cells were analyzed to determine whether differences in unitary autaptic vs.  
150 synaptic transmission onto other PV cells could be accounted for by any of the quantal parameters.  
151 We noticed that the strength of self- vs. heterosynaptic inhibition defined two connectivity patterns  
152 of PV cells: those with stronger autaptic than synaptic PV-PV connections, and those, which showed  
153 an opposite trend (referred to as ‘introverted’ and ‘extroverted’ PV cells, respectively; Fig. 3A,B). In  
154 our hands, ‘introverted’ PV cells (in which autIPSCs  $>$  synIPSCs) corresponded to 63.1% of the total  
155 dual connected sample ( $n = 24$  out of 38). Of those 38 PV cells, stable experiments suitable for BQA  
156 analysis were obtained in 15 pairs, 9 of which were ‘introverted’ and the remaining 6 ‘extroverted’



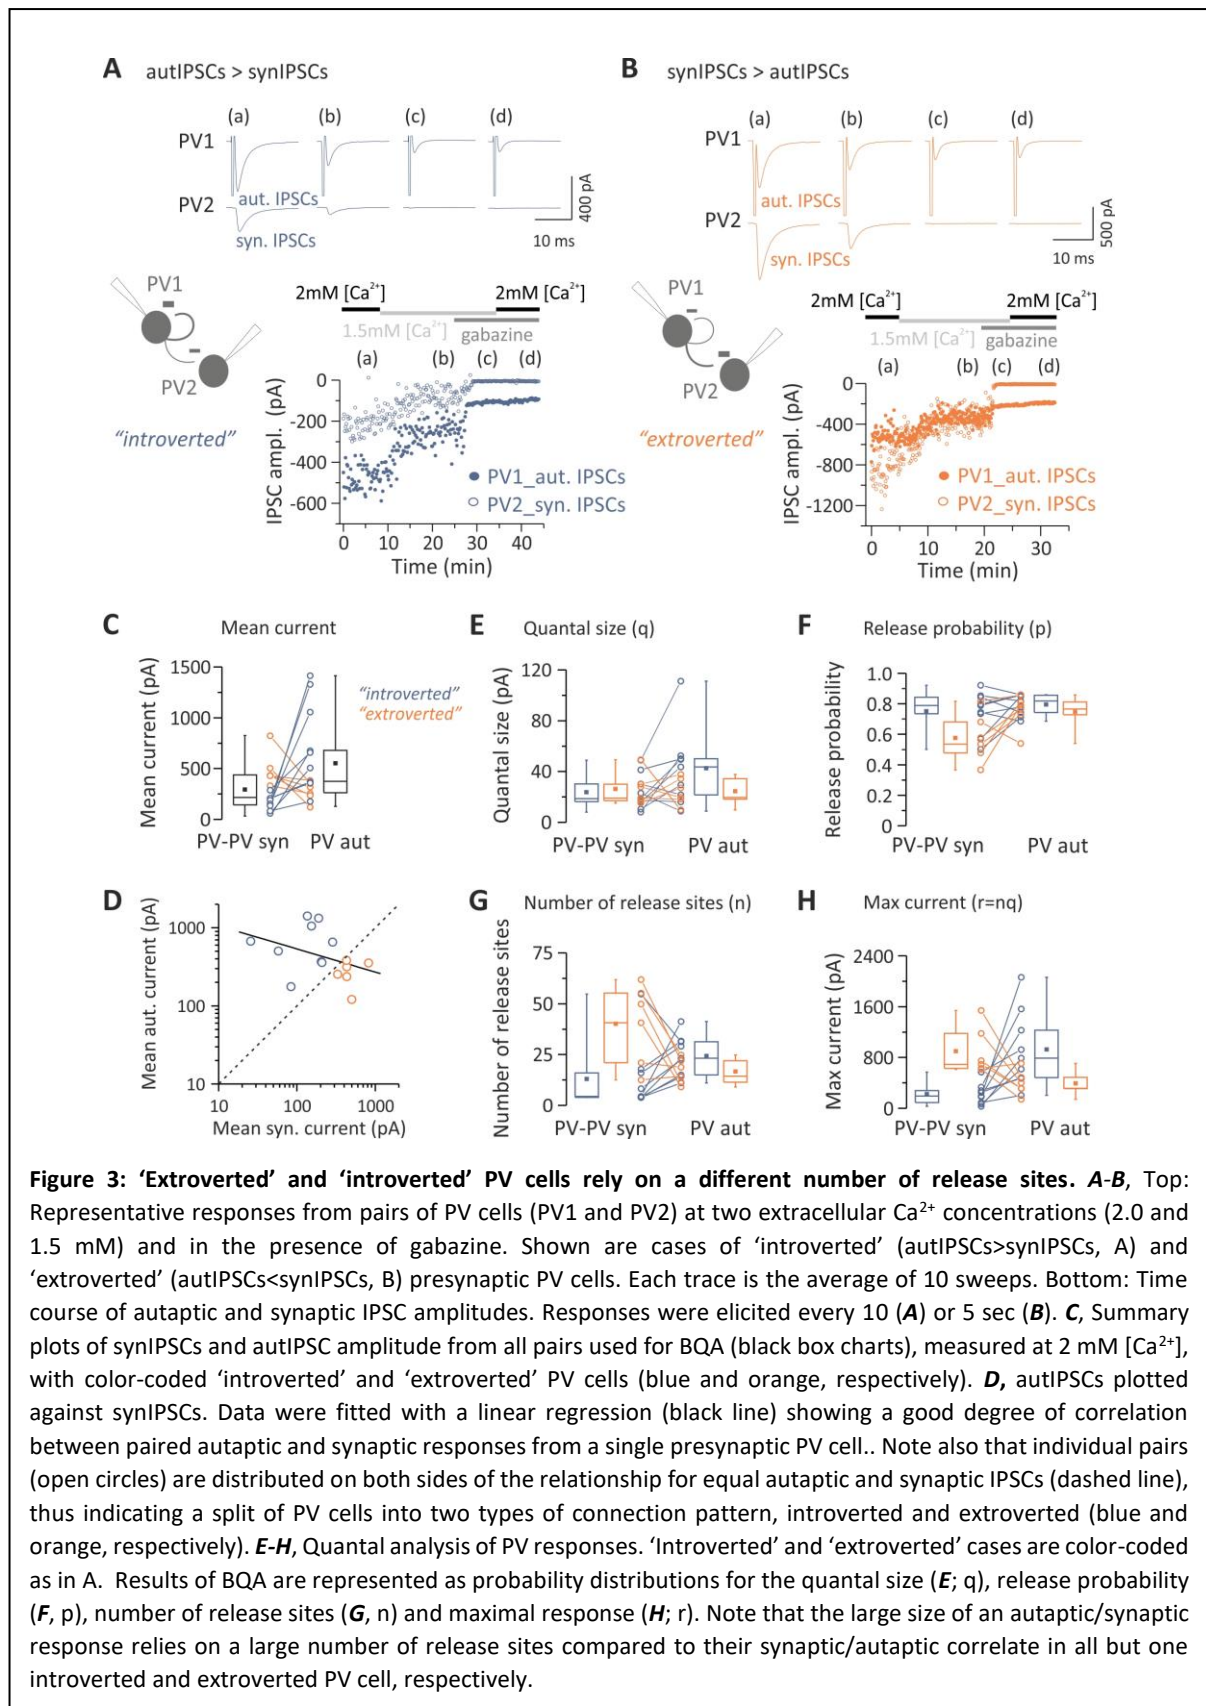

157 PV cells (corresponding to 60 and 40%, respectively; Fig. 3C,D). Importantly, the size of autaptic and  
 158 unitary synaptic response were inversely correlated ( $R = -0.5643$ ,  $p=0.031$ ; Fig. 3D), suggesting the

159 existence of two connectivity patterns between PV cells that could be distinguished by their self-  
160 inhibition strength. We found that in both ‘introverted’ and ‘extroverted’ PV cells, autaptic and  
161 synaptic quantal size ( $q$ ) was similar for both ‘introverted’ and ‘extroverted’ PV cells ( $n = 9$  and  $6$ ,  
162 respectively; Fig. 3E). In addition, release probability ( $P_r$ ) was similar for self- and PV-PV synaptic  
163 inhibitory contacts; Fig 3F). However, we found that a differential number of release sites ( $n$ )  
164 determined the strength of autaptic and synaptic connections onto PV cells. Indeed, in 8 out of 9  
165 ‘introverted’ PV-cell pairs, the number of release sites ( $n$ ) was larger in autaptic than synaptic  
166 connections (Table 4; Fig. 3G, red symbols). Accordingly, the opposite was true for ‘extroverted’ PV-  
167 cell pairs, in which in 5 out of 6 cases, the number of autaptic release sites was smaller than PV-PV  
168 synaptic connections (Table 4; Fig. 3G, grey symbols). Therefore, the maximal autaptic response  $r$  (or  
169  $nq$ ) was larger or smaller in ‘introverted’ and ‘extroverted’ PV cell pairs, respectively (Table 4; Fig. 3H).

170         These results indicate that the strength of autaptic transmission in PV cells, as compared to  
171 heterosynaptic PV-PV connections, is determined by the number of release sites and thus, can be  
172 accounted for by structural differences, in contrast with PV-PN connections, where the greater  
173 strength of autaptic vs. heterosynaptic currents is mainly determined by differences in the quantal  
174 size.

175

#### 176 **Autaptic neurotransmission accounts for a large fraction of the total inhibition onto single PV cells.**

177         The prevalence of self- vs. synaptic GABAergic transmission originating from PV cells  
178 prompted the question of whether autaptic transmission provides a large proportion of the total  
179 synaptic inhibition that these cells receive. To measure the autaptic fraction contributing to the overall  
180 perisomatic inhibition received by single PV cells, we progressively blocked autaptic  
181 neurotransmission while evoking GABA release from virtually all terminals impinging the cell bodies  
182 of recorded PV cells. Autaptic transmission was blocked by intracellular perfusion of the fast  $Ca^{2+}$   
183 chelator BAPTA (20 mM membrane impermeable free acid, in the presence of 2 mM  $Ca^{2+}$ ). Diffusion

184

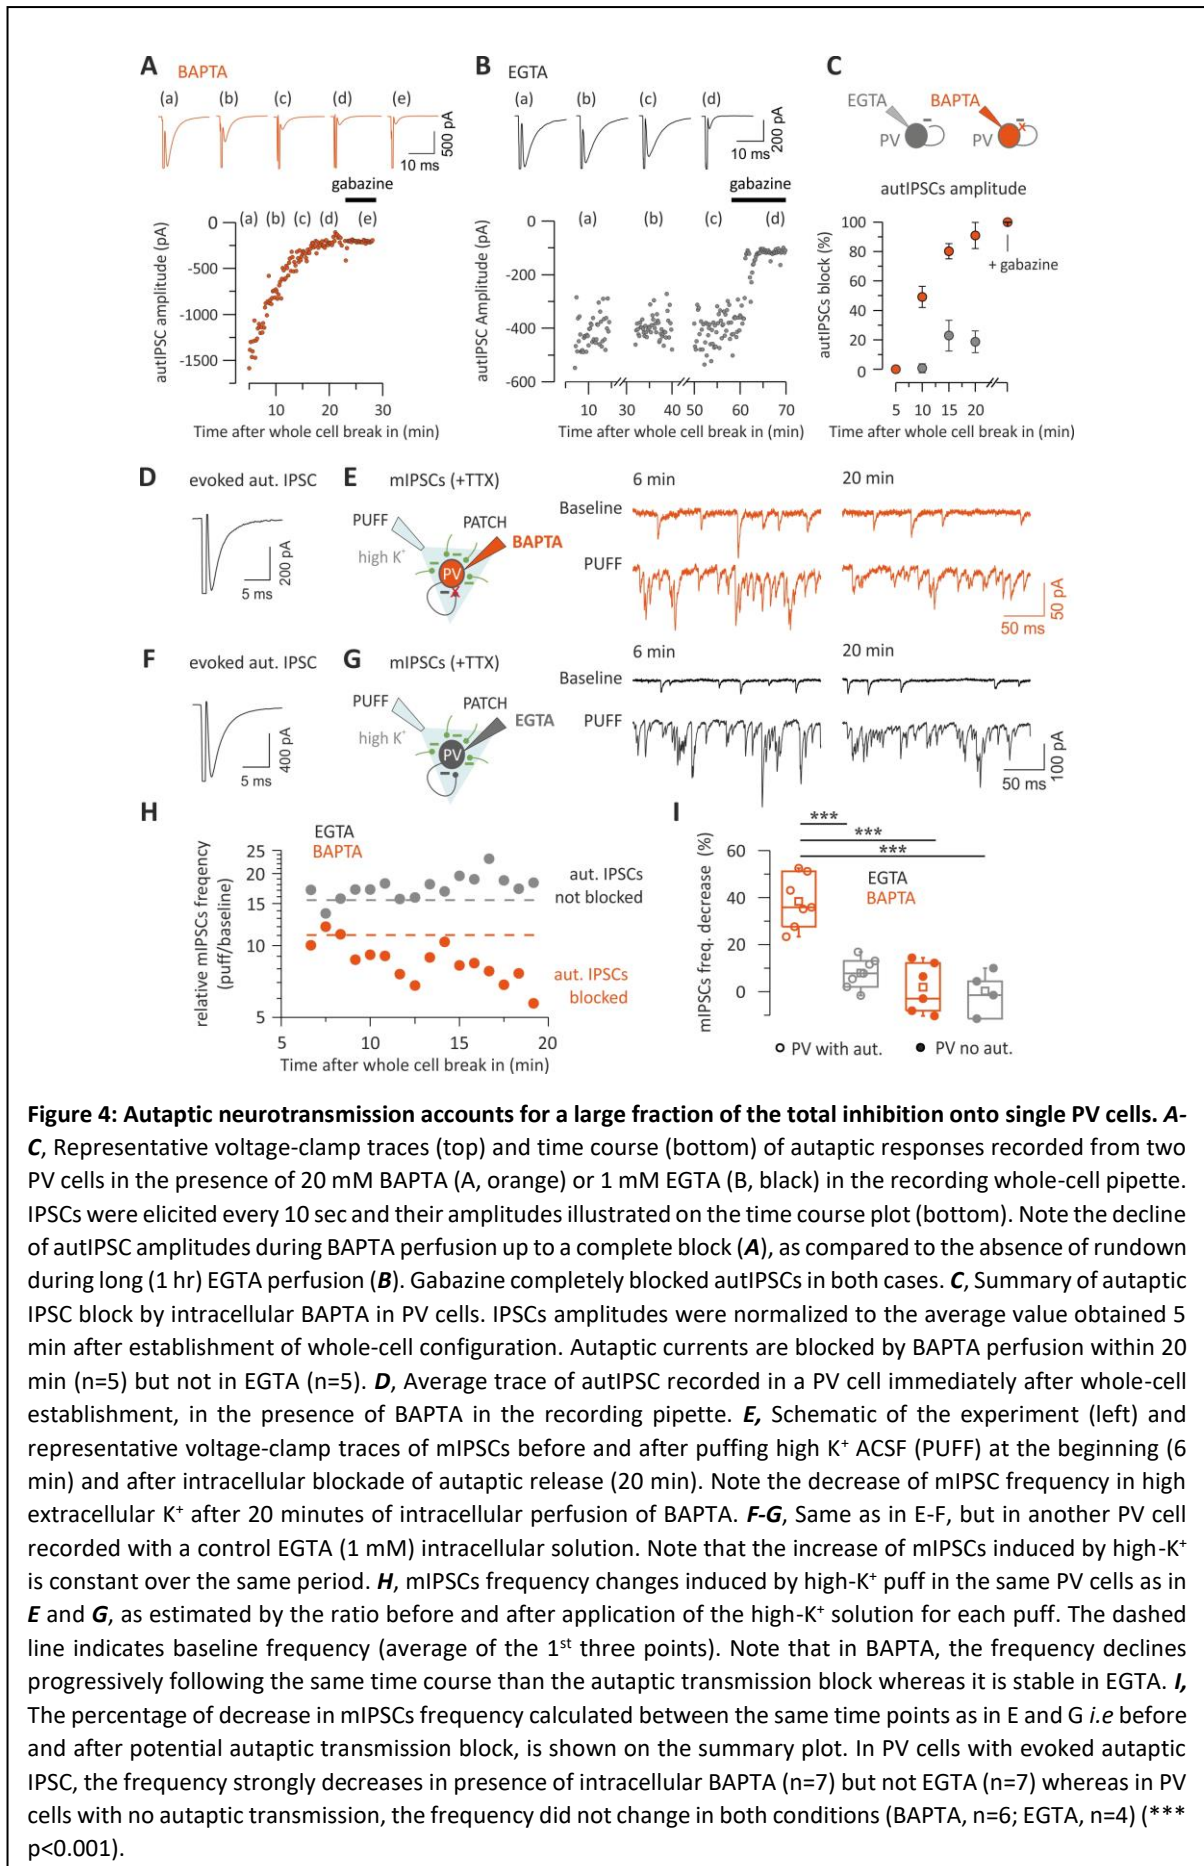

185 autaptic neurotransmission was typically achieved within 20 minutes following whole-cell break in  
186 (Fig. 4A). In order to rule out that this time-dependent reduction of autaptic responses was due to  
187 non-specific rundown, we performed some control experiments, in which autIPSCs were recorded  
188 with an intracellular solution containing low concentration (1 mM) of the slow  $\text{Ca}^{2+}$  chelator EGTA,  
189 mimicking endogenous  $\text{Ca}^{2+}$  buffering by parvalbumin (Collin et al., 2005). In the presence of  
190 intracellular EGTA, autIPSCs were stable for long periods (up to 1 hour, Fig. 4B) (Bacci et al.,  
191 2003;Manseau et al., 2010).

192 On average, after 20 min of intracellular BAPTA diffusion, autIPSC amplitude was  $9.1 \pm 8.8 \%$   
193 of control (n=5), whereas in the same timeframe, intracellular EGTA diffusion did not affect autaptic  
194 transmission ( $81.3 \pm 7.4 \%$  of control; n=5). To measure the relative fraction of autaptic inhibition onto  
195 PV cells, we first tested whether or not the recorded PV cell exhibited an autaptic response (Fig. 4D);  
196 we subsequently applied the  $\text{Na}^+$ -channel blocker tetrodotoxin (TTX,  $1 \mu\text{M}$ ) and measured a baseline  
197 period of miniature mIPSCs. Using a local micropipette, we then puffed ACSF with a high concentration  
198 of KCl (20 mM) to depolarize all synaptic terminals impinging upon the recorded PV cell, thus forcing  
199 global  $\text{Ca}^{2+}$ -dependent release of GABA without inducing unwanted network effects (Fig. 4E). We  
200 repeated the high  $\text{K}^+$  puffs once per minute, for at least 20 min, and we measured the relative increase  
201 of mIPSC frequency (puff/baseline) as an estimate of global perisomatic inhibition onto the recorded  
202 cell (Fig. 4 D-G).

203 In the presence of 20 mM intracellular BAPTA, the high- $\text{K}^+$ -dependent increase in mIPSC  
204 frequency declined steadily within 20 minutes after whole-cell break in (Fig. 4H), consistent with a  
205 complete autaptic blockade (Fig. 4B). In contrast, in control experiments in which EGTA was internally  
206 diffused, the increase of mIPSC frequency was stable over the same period of time (Fig. 4H). On  
207 average, mIPSC frequency blockade was  $38.4 \pm 4.2 \%$  and  $7.9 \pm 2.4 \%$  in the presence of BAPTA and  
208 EGTA, respectively (BAPTA n = 7; EGTA n=7;  $p < 3.9\text{E-}5$ ; one way ANOVA, followed by Tukey's  
209 comparison; Fig. 4I). Importantly, in those PV cells lacking autaptic responses, the high  $\text{K}^+$ -dependent  
210 increase of mIPSC frequency was stable over time, regardless of whether intracellular BAPTA or EGTA

211 was present, ruling out non-specific effects of BAPTA on mIPSCs. ( $1.9 \pm 4.3\%$  and  $0.3 \pm 4.6\%$ ;  $n = 6$   
212 and 4, BAPTA and EGTA, respectively;  $p = 0.99$ , one-way ANOVA; Fig. 4I).

213 These results indicate that, overall, unitary autaptic self-inhibition contributes to a large  
214 fraction (~40%) of the overall inhibition that PV cells receive.

215

### 216 **$\gamma$ -Oscillations induced in Layers II/III are efficiently propagated to Layer V PV cells.**

217 PV cells play a key role in driving network oscillations in the  $\beta$ - $\gamma$ -frequency range (20-100 Hz)  
218 (Bartos et al., 2007; Buzsaki and Wang, 2012; Cardin et al., 2009; Isaacson and Scanziani, 2011; Sohal et  
219 al., 2009), believed to underlie several cognitive functions, such as attention and sensory  
220 representation (Buzsaki and Silva, 2012; Isaacson and Scanziani, 2011). Importantly, PV-PV synaptic  
221 and electrical coupling is important for synchronizing these interneurons during  $\gamma$ -oscillations (Bartos  
222 et al., 2007; Buzsaki and Wang, 2012; Mann and Paulsen, 2007), and previous evidence indicated that  
223 autaptic self-inhibition of PV cells is instrumental for their spike precision in the  $\gamma$ -frequency range  
224 (Bacci and Huguenard, 2006). We therefore tested whether autapses, that constitute the major  
225 GABAergic output of these interneurons, could modulate PV-cell spike output induced by  $\gamma$ -like  
226 activity.

227 We expressed the light-sensitive opsin channelrhodopsin2 (ChR2) in a fraction of Layer II/III  
228 PNs via *in utero* electroporation of mouse embryos (Fig. 5 A,B; see Methods). ChR2-negative PNs in  
229 the same Layer II/III area were recorded where the opsin was expressed. In agreement with previous  
230 reports (Adesnik and Scanziani, 2010; Hakim et al., 2018; Shao et al., 2013), illumination of cortical  
231 slices with a ramp of blue light induced strong rhythmic activity of both IPSCs and EPSCs at ~30 Hz (Fig.  
232 5C,D). Layer 2/3 PNs project monosynaptically to Layer V neurons (Adesnik and Scanziani, 2010). We  
233 therefore simultaneously recorded Layer V PV cells and ChR2-negative PNs in Layer II/III (Fig. 5E) to  
234 measure rhythmic IPSCs in Layer II/III PNs and voltage fluctuations of Layer V PV cells (see Methods).  
235 We found that light-evoked  $\gamma$ -activity in Layer II/III was reliably transmitted to Layer V PV cells, as

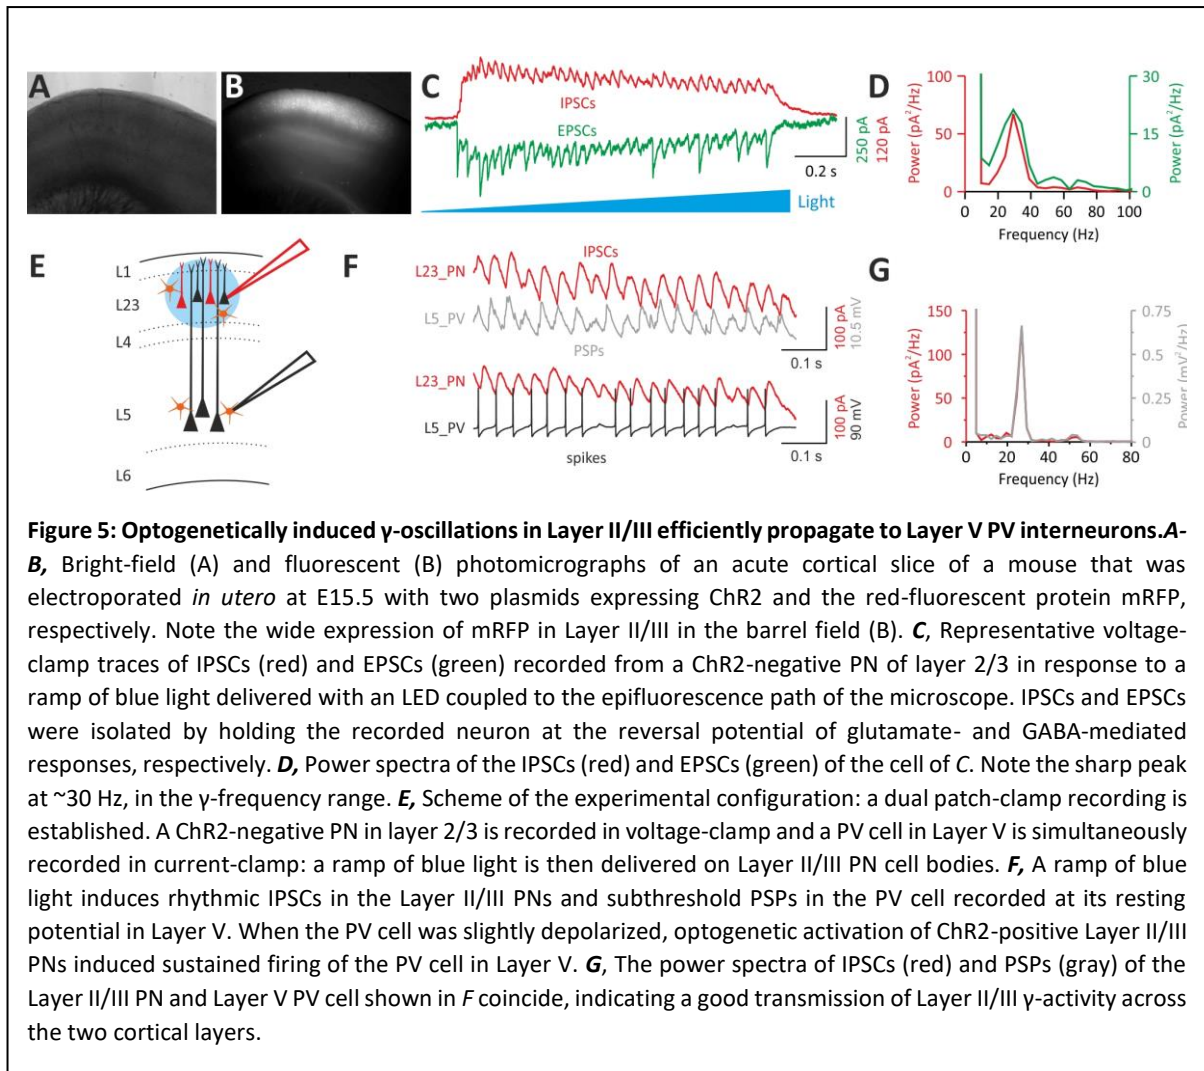

236 shown by subthreshold PSPs, which oscillated at the same frequency of IPSCs recorded in Layer II/III  
 237 (Fig. 5F,G). When the membrane potential was slightly depolarized, light activation of a fraction of  
 238 Layer II/III PNs triggered several action potentials in Layer V PV cells (Fig. 5F), strongly resembling PV-  
 239 cell firing activity recorded *in vivo* (Perrenoud et al., 2016).

240 These results indicate that optogenetically induced  $\gamma$ -oscillations in Layer II/III are faithfully  
 241 propagated to Layer V PV cells, thus allowing studying the role of autaptic self-innervation of these  
 242 cells during cortical network activity.

243

#### 244 **Autaptic neurotransmission is instrumental for locking PV-cell firing to $\gamma$ -oscillations**

245 We tested if the strong inhibitory autaptic conductance occurring after each spike in PV cells  
 246 is important for synchronizing these interneurons during  $\gamma$ -oscillations. Autaptic responses cannot be



247 measured in physiological low intracellular  $[Cl^-]$ , as they overlap with spike afterhyperpolarizations  
248 (AHPs). However, autaptic transmission was shown to modulate AHP duration (Pawelzik et al., 2003)  
249 and inter-spike intervals (Bacci and Huguenard, 2006) of cortical fast-spiking interneurons.

250 In control conditions (with intracellular 1 mM EGTA), PV cells showed a broad range of AHP  
251 durations (Fig. 6A,B), consistent with varying strengths of autaptic transmission across different PV  
252 cells (Pawelzik et al., 2003). When autaptic neurotransmission was blocked by intracellular perfusion  
253 of BAPTA (Fig. 4) (Bacci et al., 2003;Manseau et al., 2010), AHP duration was significantly smaller  
254 ( $17.96 \pm 1.02$  vs.  $5.66 \pm 0.42$  ms; EGTA vs. BAPTA, respectively;  $p = 7.75E-16$ ; independent *t*-test; Fig.  
255 6A,B) and with a much reduced dispersion between cells (coefficient of dispersion: 2.6 vs. 0.9, EGTA  
256 vs. BAPTA, respectively,  $p = 4.06E-8$ ; two-sample test for variance; Fig. 6B). This BAPTA-induced  
257 shortening of AHP likely resulted from the combined effect of this fast  $Ca^{2+}$  chelator on both autaptic  
258 transmission and  $Ca^{2+}$ -activated  $K^+$  conductances, that are known to shape the AHP waveform (Sah  
259 and Faber, 2002).

260 Under control (EGTA) conditions, the specific duration of the AHP determined the coupling of  
261 PV-cell spikes with  $\gamma$ -oscillations. Indeed, PV cells with slow AHPs, produced spike trains, which were  
262 regular and strongly coupled to  $\gamma$ -oscillations, as the large majority of action potentials occurred  
263 almost invariably at a precise time during the  $\gamma$ -cycle (Fig. 6C). This strong coupling of PV-cell spiking  
264 activity with  $\gamma$ -oscillations determined a very sharp, unimodal distribution of inter-spike intervals (ISIs)  
265 peaking at the  $\gamma$ -oscillation period, as well as a sharp phase coupling histogram (Fig. 6D). PV cells with  
266 faster AHPs exhibited high-frequency doublets (Fig. 6E,F), and/or bursts of spikes (Fig. 6G,H). In these  
267 cases, ISI distributions were multimodal, exhibiting peaks at shorter intervals than the oscillation  
268 period. Moreover, the spike coupling to  $\gamma$ -phase was increasingly less sharply distributed (Fig. 6F,H).

269 Multi-modality of ISI distributions and broad spike-phase coupling resulted from an increasing  
270 number of spikes with very fast intervening ISIs, not effectively matching the period of ongoing  $\gamma$ -  
271 rhythm in Layer II/III (Fig. 6F,H). Control PV cells characterized by the shortest AHPs and consequent  
272 weak coupling with  $\gamma$ -oscillations (Fig. 6G,H) exhibited firing patterns that were similar to PV cells, in

273

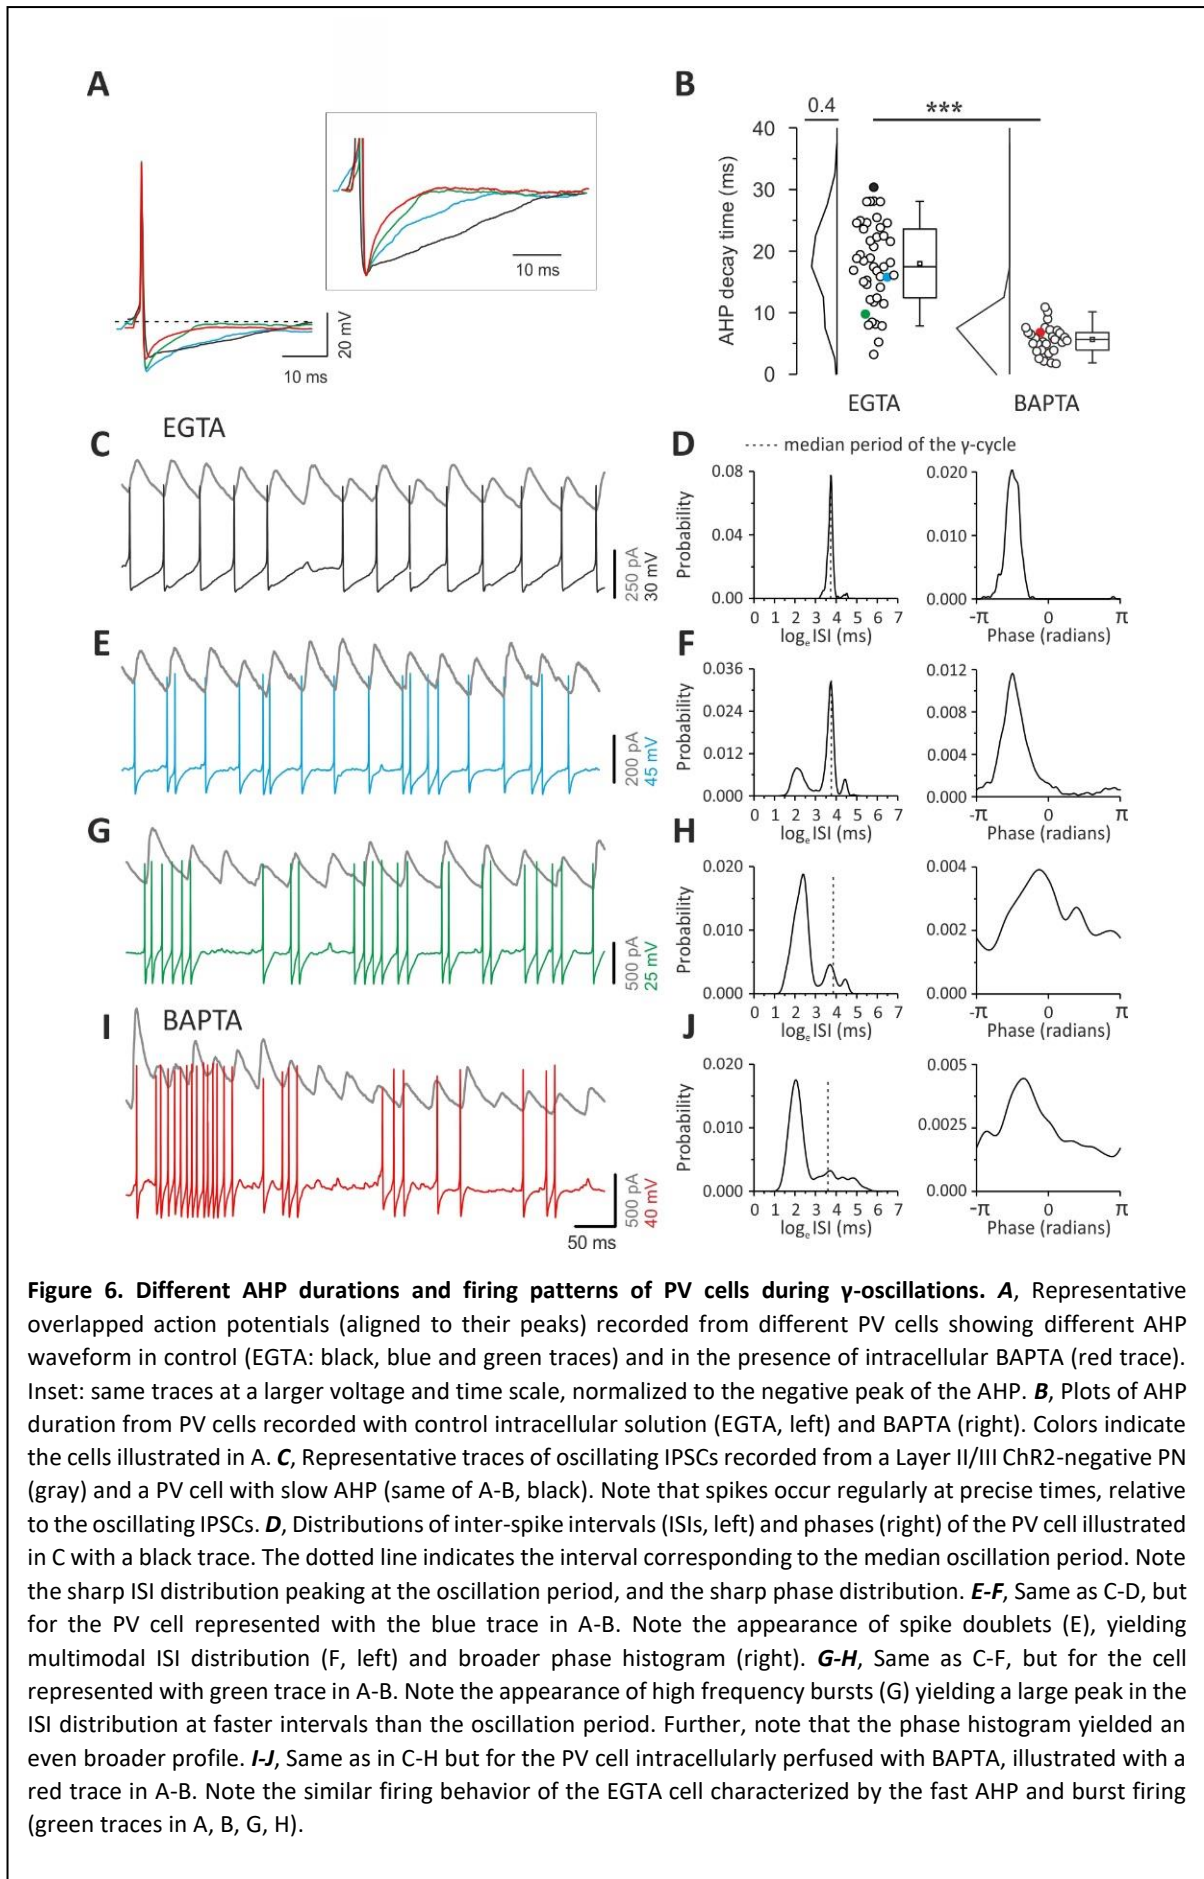



274 These PV cells intracellularly perfused with BAPTA consistently produced high frequency bursts of  
275 spikes (Fig. 6I), yielding ISI distributions with the largest peak at a faster interval than the oscillation  
276 period and broad spike-phase coupling distributions (Fig. 6J).

277 On average, the distribution of ISIs in control (EGTA) cells peaked close to the  $\gamma$ -cycle.  
278 Conversely, BAPTA-filled PV interneurons discharged with ISIs not matching the  $\gamma$ -period (mean log  
279 ratio:  $-0.147 \pm 0.077$  and  $-1.078 \pm 0.155$  in EGTA and BAPTA, respectively,  $p = 6.45E-7$ , Wilcoxon rank-  
280 sum; Fig. 7A). Further, distributions of ISIs were significantly less dispersed in control (EGTA) PV cells  
281 as compared to PV cells filled with BAPTA as measured by the log ISI entropy (mean:  $6.51 \pm 0.08$  and  
282  $6.87 \pm 0.11$  bits in EGTA and BAPTA, respectively,  $p = 0.0063$ , Mann-Whitney; Fig. 7A). For each PV cell,  
283 the slower the AHP, the closer to the  $\gamma$ -period was its ISI, whereas PV cells exhibiting fast AHP (such  
284 as those whose autapses were blocked by intracellular BAPTA) fired with ISIs that were faster than the  
285  $\gamma$ -period (Spearman  $R = 0.553$ ;  $p = 4.02E-7$ ; Fig. 7B).

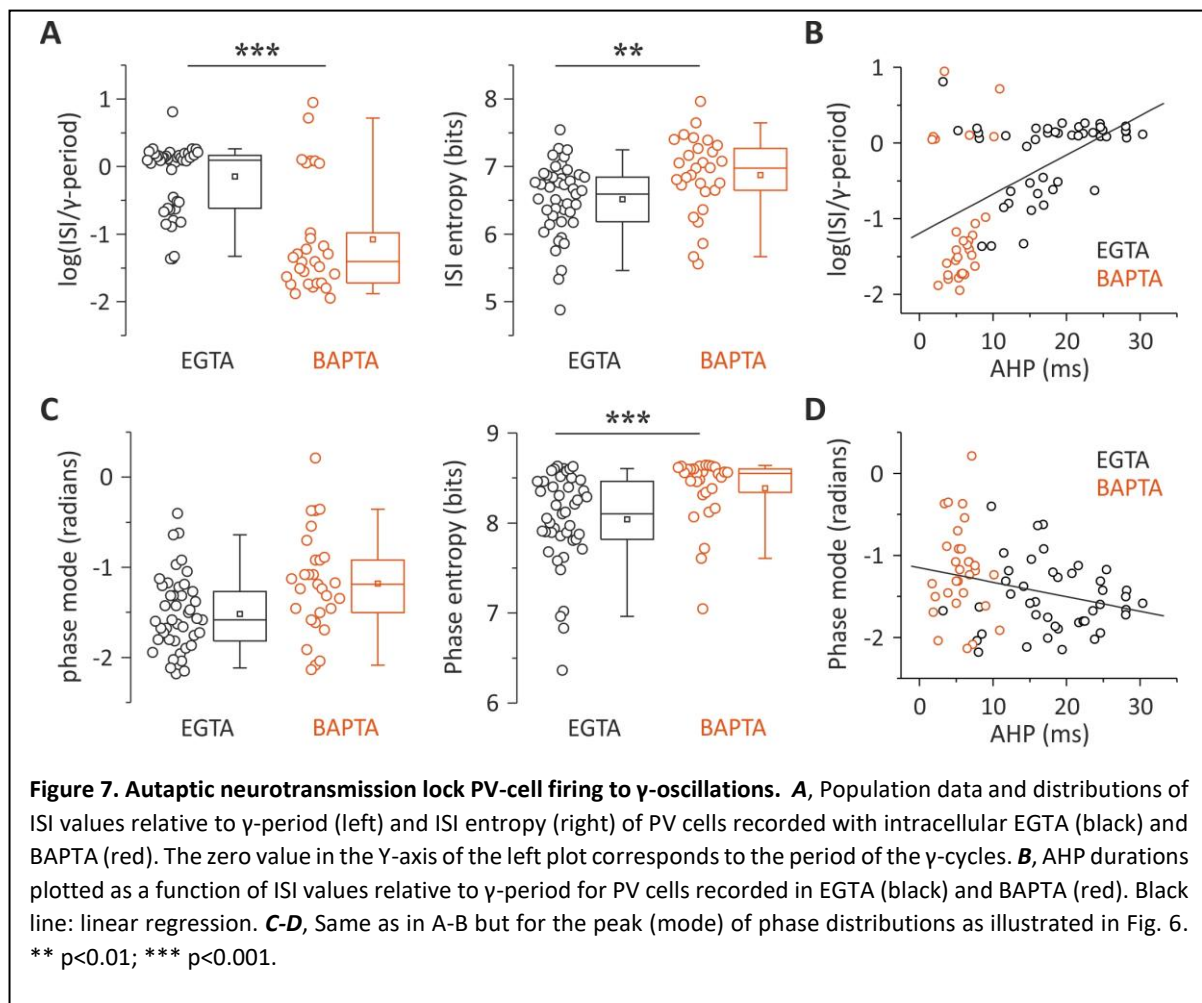

286 The peaks of phase distributions were not significantly different in EGTA and BAPTA ( $-1.524 \pm 0.0613$   
287 and  $-1.189 \pm 0.098$  radians respectively,  $p=0.1$ , k-test for circular distribution Fig. 7C). However the  
288 dispersion of their distributions were different in control (EGTA) vs. BAPTA-filled PV cells, indicating a  
289 lesser extent of phase lock induced by intracellular perfusion of BAPTA as measured by the entropy of  
290 the phase distribution (mean:  $8.041 \pm 0.078$  and  $8.387 \pm 0.0689$  bits in EGTA and BAPTA, respectively,  
291  $p= 4.6E-4$ , ; Fig. 7C). Also in the case of phase, a significant correlation was found between AHP  
292 duration and phase (Spearman  $R = -0.285$ ;  $p = 0.0145$ ; Fig. 7D).

293 Altogether, these results suggest that the strength of autaptic self-inhibition determines the  
294 coupling of PV-cell spiking to  $\gamma$ -oscillations, by modulating the duration of their own AHPs.

295

## 296 Discussion

297 Here we found that autaptic transmission is overall the most powerful output from PV cells in  
298 neocortical Layer V. Autaptic transmission is  $\sim 3$ -fold stronger than synaptic inhibition onto PNs, and  
299  $\sim 2$ -fold larger than PV-PV connections. Moreover, we found that PV cells with strong autaptic  
300 transmission produce a weaker synaptic output onto other PV cells and vice versa, thus defining a  
301 novel architecture of relative connectivity strength. Despite the existence of a minority of PV cells with  
302 stronger PV-PV synaptic than autaptic transmission, self-inhibitory autapses, originating from a single  
303 axon, contribute up to  $\sim 40\%$  of the entire perisomatic inhibition onto PV cells. Strong, reliable and fast  
304 autaptic self-inhibition of PV cells contributes to duration of the AHP and therefore the ISIs of these  
305 interneurons, affecting their degree of synchronization with  $\gamma$ -oscillations.

306 The observation of larger autaptic currents than inhibitory synaptic responses elicited by the  
307 same PV cells onto PNs was not due to differences in the number of release sites, but to a larger  
308 autaptic quantal size. A larger quantal size can be ascribed to several causes, including, for example,  
309 different subunit composition of GABA<sub>A</sub>Rs, their expression level at postsynaptic sites, their  
310 phosphorylation state, and the specific interactions with distinct scaffolding, anchoring and trans-  
311 synaptic proteins (Fritschy et al., 2012).

312 Another reason for a smaller quantal size in PNs could be a more distal location of PV-PN  
313 synapses as opposed to PV cell autapses. This could result in more low-pass filtering of synaptic  
314 responses with a consequent reduction in their size. Although we cannot exclude that this is the case,  
315 we argue against this possibility, since PV cells are known to be perisomatic targeting (Freund and  
316 Katona, 2007). Indeed, the cell body of large Layer V PNs is almost completely innervated by PV-  
317 positive inhibitory terminals (Bodor et al., 2005). This is consistent with the very fast rise-time of PV-  
318 PN unitary synaptic responses (<1 ms, data not shown). Finally, although a different quantal size  
319 between two synaptic connections is traditionally ascribed to postsynaptic factors, we cannot exclude  
320 that the difference in  $q$  could be due to a different amount of neurotransmitter released by each  
321 vesicle at each individual synapse. Future studies will be necessary to pinpoint the molecular  
322 mechanism underlying the difference in quantal size between autapses onto PV cells and synapses  
323 onto PNs.

324 Curiously, connections between PV cells showed a connectivity logic dictated by their actual  
325 autaptic strength. Although self-contacts were generally stronger than heterosynaptic connections  
326 with other PV cells, autapses were weaker in a minority of cases (~38%). In both 'introverted' and  
327 'extroverted' PV cells, the difference between autaptic and synaptic strength was due to a higher or  
328 lower number of release sites, and thus it was due to anatomical specificities. Similar quantal size at  
329 autaptic and synaptic connections between PV cells indicates that postsynaptic sensitivity to released  
330 GABA at autaptic contacts is equivalent to that of synaptic connections. This could be due to  
331 expression of molecularly similar postsynaptic receptor clusters, and similar degree of autaptic and  
332 synaptic filtering.

333 The existence of 'extroverted' and 'introverted' PV cells prompts the question of whether they  
334 belong to different cell types. Whereas we detected no changes of passive and firing properties of  
335 'introverted' and 'extroverted' (data not shown), we cannot exclude differential morphology and/or  
336 connectivity patterns. Alternatively, the differential strength of self- vs. heterosynaptic inhibitory  
337 contacts could be due to activity-dependent plasticity of GABAergic connections from PV cells. Indeed,

338 it has been shown that postsynaptic activity could modulate the strength of GABAergic synapses from  
339 PV cells in the visual (Xue et al., 2014) and somatosensory cortex (Lourenco et al., 2014). Future studies  
340 will be necessary to reveal the mechanisms underlying the differential autaptic and synaptic strength  
341 onto PV cells.

342         Functional autaptic neurotransmission represents a powerful form of fast disinhibition of PV  
343 cells. Accumulating evidence indicates that disinhibitory circuits play crucial roles for several cognitive  
344 functions (Kepecs and Fishell, 2014;Letzkus et al., 2015;Pi et al., 2013;Tremblay et al., 2016). In  
345 particular, disinhibition operated by VIP cells (Gulyas et al., 1996;Pfeffer et al., 2013) may be crucial  
346 for auditory discrimination (Pi et al., 2013), memory retention in prefrontal cortex (Kamigaki and Dan,  
347 2017) and other forms of associative learning and memory (Letzkus et al., 2015). Importantly,  
348 however, VIP cell-mediated disinhibition requires multi-synaptic circuits, and, because it occurs over  
349 relatively long (100s of ms) time windows, it might be important for modulating the information  
350 carried by a whole spike train according to a traditional rate-coding scheme. By contrast, autaptic self-  
351 inhibition of PV cells accounts for ~40% of the total perisomatic inhibition they received. It is fast  
352 (occurring at a millisecond timescale) and activated by single spikes. Autaptic disinhibition of PV cells  
353 should therefore be crucial for encoding information carried by the precise timing of individual spikes  
354 within a high-frequency train. Indeed, we show that fast GABAergic self-inhibition of PV cells  
355 modulates the locking of their spike timing to network oscillations in the  $\beta$ - $\gamma$ -frequency range.

356         Autaptic transmission occurs immediately after single action potentials, thus modulating the  
357 duration of the AHPs of PV cells during trains of spikes (Bacci and Huguenard, 2006;Pawelzik et al.,  
358 2003). In control (EGTA) conditions, we found a broad range of AHP durations. This is consistent with  
359 heterogeneous autaptic strengths among several PV cells, and lack of functional self-innervation in  
360 some cases (~30%). Accordingly, autaptic blockade by intracellular BAPTA invariably produced fast  
361 AHPs and high frequency firing. Relatively long-lasting AHPs correlated with a strong synchronization  
362 of PV-cells output with  $\gamma$ -oscillations. Importantly, the tight locking of PV-cell spikes to  $\gamma$ -activity shown

363 here was similar to that recorded from PV cells in the visual cortex *in vivo* in the absence and presence  
364 of sensory stimuli (Perrenoud et al., 2016).

365 Interestingly, faster AHPs were responsible for the generation of high frequency doublets  
366 and/or bursts of spikes. This activity could be detected in virtually all cells intracellularly perfused with  
367 BAPTA. The sharpening of PV-cell AHPs induced by intracellular BAPTA was likely due to the blockade  
368 of autaptic transmission combined to the impairment of Ca<sup>2+</sup>-activated K<sup>+</sup> channels, both contributing  
369 to AHP peak and duration (Sah and Faber, 2002). Interestingly, a minority of cells recorded with  
370 intracellular control (EGTA) conditions exhibited sharp AHPs similar to those recorded with  
371 intracellular BAPTA. This is consistent with the fraction of PV interneurons lacking functional autaptic  
372 transmission, but with intact Ca<sup>2+</sup>-activated K<sup>+</sup> channels. The heterogeneity of AHP durations and firing  
373 behaviors during  $\gamma$ -activity in control PV cells suggests that the instantaneous spike frequency is highly  
374 controlled by autaptic strength. A strong GABAergic conductance, reliably activated with a high release  
375 probability immediately after each spike, shapes the window of opportunity to fire a subsequent spike.  
376 Therefore, rhythmic glutamatergic activation of PV cells by Layer II/III PNs and the strong, fast and  
377 reliable autaptic self-inhibition work in synergy to lock PV-cell firing to the oscillation period. Given  
378 the crucial role of mutual inhibition between PV cells during synchronous network activity (Cardin et  
379 al., 2009;Sohal et al., 2009), spike timing regulation through autaptic self-inhibition will thus strongly  
380 influence the output spike timing of several PV cells in a millisecond timescale effectively  
381 synchronizing networks of PV cells during the emergence of fast oscillations.

382 Overall, our results indicate that self-inhibition of PV cells via autaptic neurotransmission is  
383 among the most powerful connections from this cell type within the layer 5 cortical microcircuit  
384 promoting their spiking synchronization during  $\gamma$ -oscillations. GABAergic autaptic self-inhibition of PV  
385 cells is therefore an important mechanism underlying the key role of these cells during cognitive-  
386 relevant network oscillations, with possible crucial consequences in both physiological and  
387 pathological cortical operations.

388

## 389 **Methods**

### 390 **Animals**

391 Experimental procedures followed national and European (2010/63/EU) guidelines and were  
392 approved by the authors' institutional review boards and national authorities. All efforts were made  
393 to minimize suffering and reduce the number of animals. Experiments were performed on C57BL/6J  
394 mice obtained by breeding PV-cre mice to a reporter line harboring a loxP-flanked STOP cassette  
395 associated to the red fluorescent protein variant tdTomato (line Ai14 jax line 007914). This mouse line  
396 allowed recognition of PV interneurons in live acute slices. Indeed, tdTomato-expressing cells had  
397 typical multipolar morphology, aspiny dendrites and fast-spiking behavior (not shown).

### 398 **In utero electroporation**

399 Timed-pregnant PV-cre female mice bred with tdTomato males (15.5 days postcoitum) were  
400 anaesthetized with 1-2% isoflurane. The abdomen was cleaned with 70% ethanol and swabbed with  
401 betadine. Buprenorphine (0.05 mg/kg) was administered subcutaneously for preoperative analgesia  
402 and local anesthetic bupivacaine (2.5mg/kg) was injected between the skin and the abdomen 5 min  
403 before incision. A midline ventral laparotomy was performed and the uterus gently exposed and  
404 moistened with PBS pre-warmed at 37 °C. pCAG-mRFP (0.8 µg/µl) (Addgene #28311) (Manent et al.,  
405 2009) (plasmid DNA was mixed with pCAG-ChR2-Venus (0.8 µg/µl) (Addgene #15753) (Petreanu et al.,  
406 2007) and Fast Green (0.025%; Sigma) in saline solution (PBS).

407 Each embryo was injected with the mix DNA solution through the uterine wall into the lateral ventricle  
408 using pressure-controlled bevelled glass capillaries (WPI micropipette beveler). After each injection,  
409 tweezers disk electrodes (platinum 5mm round, Sonidel) were positioned at 0° angle with respect to  
410 the rostral-caudal axis of the head of each embryos and voltage pulses (5 pulses, 40 V; 50 ms; 5Hz)  
411 were applied to electroporate the DNA (square wave electroporator, Nepa Gene). The uterine horn  
412 containing the embryos was then placed back into the peritoneal cavity and moistened with PBS. The  
413 abdomen and skin were sutured and the latter was cleaned with betadine. The procedure typically  
414 lasted maximum 40 min starting from anesthesia induction. Pups were born by natural birth and

415 screened for location and strength of transfection by trans-cranial epifluorescence under a  
416 fluorescence stereoscope.

417

### 418 **In vitro slice preparation**

419 Naïve or *in utero* electroporated mice were deeply anesthetized with isoflurane, decapitated and the  
420 brains quickly removed. Coronal slices were prepared from somatosensory cortex of mice aged (P15-  
421 P25) using a vibratome (Leica VT1200 S) in a free or reduced sodium cutting solution (4°C). Slices were  
422 initially stored at 34°C for 30 min in standard or reduced sodium solution (ASCF) then at room  
423 temperature for at least 1h before being transferred to a submerged recording chamber maintained  
424 at ~30°C.

425 For unitary autaptic and synaptic IPSCs experiments, coronal slices (350 µm thick) were obtained from  
426 somatosensory cortex using a free sodium cutting solution containing (in mM): choline 118, glucose  
427 16, NaHCO<sub>3</sub>, 26, KCl 2.5, NaH<sub>2</sub>PO<sub>4</sub> 1.25, MgSO<sub>4</sub> 7, CaCl<sub>2</sub> 0.5, pyruvic acid 3, myo-inositol 3, ascorbic acid  
428 0.4 gassed with 95% O<sub>2</sub> and 5% CO<sub>2</sub>. Then, slices were stored in oxygenated standard ASCF (in mM):  
429 NaCl 126, KCl 2.5, CaCl<sub>2</sub> 2, MgSO<sub>4</sub> 1, NaH<sub>2</sub>PO<sub>4</sub> 1.25, NaHCO<sub>3</sub> 26, glucose 20; pH 7.4.

430 For photo-induced gamma oscillations experiments, 400 µm-thick coronal somatosensory cortical  
431 slices were prepared from the transfected hemisphere. Slices were cut and stored in oxygenated  
432 reduced sodium ACSF containing (in mM): NaCl 83, sucrose 72, glucose 22, NaHCO<sub>3</sub> 26, KCl 2.5,  
433 NaH<sub>2</sub>PO<sub>4</sub> 1, MgSO<sub>4</sub> 3.3, CaCl<sub>2</sub> 0.5, pyruvic acid 3, myo-inositol 3, ascorbic acid 0.4; pH 7.4.

434

### 435 **Electrophysiology**

#### 436 *Unitary autaptic and synaptic IPSCs*

437 Recordings were obtained in standard ACSF at 30°C from PV-PV cells pairs and PV-PN pairs of Layer V  
438 primary barrel somatosensory cortex. Neuron types were visually determined using infrared video  
439 microscopy. PV interneurons were visible as tdTomato positive fluorescent cells whereas PNs were  
440 identified by their large soma and emerging apical dendrite together with firing behavior. Whole-cell

441 voltage-clamp recordings were obtained with patch pipettes (2-4 M $\Omega$ ) filled with a high [Cl<sup>-</sup>]  
442 intracellular solution containing (in mM): K-gluconate 70, KCl 70, Hepes 10, EGTA 1, MgCl<sub>2</sub> 2, MgATP  
443 4, NaGTP 0.3 or K-gluconate 35, KCl 70, Hepes 10, 4K-BAPTA 20, CaCl<sub>2</sub> 2, MgATP 4, NaGTP 0.3; pH 7.2  
444 adjusted with KOH; 290 mOsm; for EGTA and BAPTA experiments, respectively. GABA<sub>A</sub> receptor-  
445 mediated IPSCs were isolated by adding 6,7-dinitroquinoxaline-2,3,dione (DNQX, 10  $\mu$ M) in the bath  
446 perfusion and recorded at a holding potential of -80 mV or -70 mV. For miniature IPSCs (mIPSCs)  
447 recordings, DNQX and tetrodotoxin (TTX, 1  $\mu$ M) were added to the bath perfusion. When indicated,  
448 SR95531 [6-imino-3-(4-methoxyphenyl)-1(6H)-pyridazine-butanoic acid hydribromide] (gabazine, 10  
449  $\mu$ M) was also applied by bath perfusion to block GABA<sub>A</sub> receptors. All drugs were obtained from Tocris  
450 Cookson (Bristol, UK).

451

#### 452 *Photo-induced $\gamma$ -oscillations*

453 Once being transferred to the submerged recording chamber, slices were superfused with modified  
454 ACSF containing (in mM): NaCl 119, KCl 2.5, CaCl<sub>2</sub> 2,5, MgSO<sub>4</sub> 1,3, NaH<sub>2</sub>PO<sub>4</sub> 1.3, NaHCO<sub>3</sub> 26, glucose 20  
455 (pH 7.4) maintained at 30°C. Before starting recordings, slices were carefully examined to check mRFP  
456 expression in Layer II/III of the somatosensory cortex. Whole-cell, voltage-clamp recordings of photo-  
457 induced  $\gamma$ -oscillations were obtained from Chr2-negative PNs identified by the pyramidal shape of  
458 their soma, the emerging apical dendrite and the absence of mRFP- and tdTomato fluorescence. Patch  
459 pipettes were filled with a cesium-based low [Cl<sup>-</sup>] intracellular solution containing (in mM): CsMeSO<sub>4</sub>  
460 125, CsCl 3, Hepes 10, EGTA 5, MgCl<sub>2</sub> 2; MgATP 4, NaGTP 0.3, QX314-Cl 5; pH 7.2 corrected with CsOH;  
461 290 mOsm. Inhibitory (IPSCs) and/or excitatory (EPSCs) postsynaptic currents were recorded at GluR  
462 and GABA<sub>A</sub>R reversal potentials, respectively. Simultaneous current-clamp recording were obtained  
463 from layer 5 tdTomato-positive fluorescent PV cells located within the same cortical column of the  
464 layer 2/3 PN, using a Kgluconate-based low [Cl<sup>-</sup>] intracellular solution containing (in mM): K-gluconate  
465 120, KCl 13, Hepes 10, EGTA 1, MgCl<sub>2</sub> 2, MgATP 4, NaGTP 0.3 or K-gluconate 103, KCl 13, Hepes 10,



466 4K-BAPTA 20, CaCl<sub>2</sub> 2, MgATP 4, NaGTP 0.3; pH 7.2 adjusted with KOH; 290 mOsm; for EGTA and BAPTA  
467 conditions, respectively.

468

#### 469 **Photo-stimulation**

470 Photo-stimulation was induced using a blue LED ( $\lambda = 470$  nm, OptoLED Lite, Cairn research, UK)  
471 collimated and coupled to the epifluorescence path of the microscope (BX51WI; Olympus). Light was  
472 delivered through a 60X (1.0 NA) water immersion lens, centered on Layer II/III. The light intensity and  
473 waveform was controlled by the analog output of a digitizer (Digidata 1440A, Molecular Devices). Light  
474 ramps had a duration of 1-3 s, a slope of 0.1-0.8 mW s<sup>-1</sup>, started at zero intensity and reached a final  
475 intensity of 0.3-1.6 mW s<sup>-1</sup>. The slope was adjusted in each slice to obtain a robust rhythmic activity in  
476 the gamma frequency range with a stable power for the entire duration of the stimulus. Light ramps  
477 were repeated with a 60 s interval.

478

#### 479 **Data acquisition and analysis**

480 Signals were amplified using a Multiclamp 700B patch-clamp amplifier (Molecular Devices, USA),  
481 sampled at 20 KHz and filtered at 2 KHz or 10 KHz in voltage-clamp and current-clamp mode,  
482 respectively. Voltage measurements were not corrected for liquid junction potential. Access  
483 resistance was <20 M $\Omega$  and monitored throughout the experiment. Recordings were discarded from  
484 analysis if the resistance changed by >20% over the course of the experiment. Data were analyzed  
485 using pClamp (Molecular devices, USA), Origin (Microcal Inc., USA), MATLAB (MathWorks, USA) and  
486 custom written scripts and software.

487

#### 488 *Unitary autaptic and synaptic IPSCs*

489 A brief (0.2-0.6 ms) depolarizing current step was injected in the presynaptic PV interneuron from PV-  
490 PV or PV-PN pairs. Voltage jumps were calibrated for each stimulated PV cell to a value ranging  
491 between -20 and 0 mV from the holding potential, to reduce the contribution of K<sup>+</sup>-mediated

492 conductance of the action current, contaminating the autaptic response. GABAergic autaptic and  
493 synaptic responses were recorded in the stimulated PV cell itself and in the paired cell (PV or PN),  
494 respectively, in whole-cell voltage-clamp mode. For quantal parameters analysis, responses were  
495 recorded at two extracellular  $\text{Ca}^{2+}$  concentrations (1.5 and 2.0 mM) to induce low and high release  
496 probabilities, respectively. Gabazine was applied at the end of the recordings to subtract the stimulus  
497 waveform and the isolated action current to autaptic responses (Fig 1A,C). The IPSCs amplitude was  
498 estimated as the current from the baseline before the onset of the stimulus to the peak on control or  
499 subtracted trace when gabazine was applied. Data were analyzed using pClamp (Molecular devices,  
500 USA), Origin (Microcal Inc., USA) and MATLAB (Mathworks, USA) software.

501

#### 502 *Bayesian quantal analysis*

503 Quantal parameters were estimated using an improved implementation of Bayesian Quantal Analysis  
504 (Bhumbra and Beato, 2013) as described previously (Bhumbra et al., 2014; Moore et al., 2015). Briefly,  
505 synaptic or autaptic currents were measured in the presence of two different  $\text{Ca}^{2+}$  concentrations (1.5  
506 and 2 mM) corresponding to intermediate and high release probabilities. BQA was performed only  
507 for experiments in which at least 50 stable responses per condition could be recorded, followed (in  
508 the case of autaptic connections) by application of gabazine in the presence of both  $\text{Ca}^{2+}$   
509 concentrations, in order to subtract the profile of the action currents, that is subject to changes  
510 following reduction of  $\text{Ca}^{2+}$ .

511 In contrast to multiple probability fluctuation analysis (MPFA) (Silver, 2003) that relies on parabolic  
512 fits to the variance-mean relationship of synaptic currents, BQA models the distribution of all  
513 amplitudes observed at different release probabilities. The advantage this confers on BQA is that  
514 quantal parameters can be reliably estimated from few response measurements obtained from only  
515 two different release probabilities (Bhumbra and Beato, 2013). Quantal parameters were estimated  
516 as the median value of the posterior distributions. The BQA implementation was modified in the  
517 selection of the marginal priors for the number of release sites. Contrary to our previous

518 implementation (Bhumbra and Beato 2013), in which the marginal priors for the probability of release  
519 and the unquantal coefficient of variation were assigned according to Jeffrey's rule, while the number  
520 of release sites had an uniform prior, here we applied Jeffrey's rule to the number of release sites as  
521 well, resulting in a reciprocal, rather than uniform, prior distribution.

522

### 523 *Miniature inhibitory synaptic events*

524 ACSF containing a high concentration of  $K^+$  (~20 mM) was applied using a pressure system  
525 (puff), through a glass pipette located near the cell body of the recorded PV interneuron to depolarize  
526 axon terminals impinging the recorded neuron. High- $K^+$  puffs induced global asynchronous release of  
527 GABA that could be detected as a substantial increase in the frequency of miniature inhibitory  
528 postsynaptic currents (mIPSCs). mIPSCs were recorded during successive sequences of baseline  
529 activity and throughout puff application (3-6 s, 1 puff / minute), for at least 20 min. Miniature  
530 GABAergic events were detected using a custom written software (Detector, courtesy J.R. Huguenard,  
531 Stanford University; Supplemental figure 1). Briefly, individual events were detected with a threshold-  
532 triggered process from a differentiated copy of the raw current trace. Detection frames were  
533 inspected visually to ensure that the detector was working properly. mIPSC frequency was calculated  
534 for successive 1 s time windows. For each puff application, the relative mIPSC frequency was estimated  
535 as the ratio between the maximum mean frequency (1 s bin) during puff application and the average  
536 of the mean frequencies for the entire baseline duration. To evaluate the percentage of mIPSC  
537 frequency decrease, we compared the relative frequency (average of 3 successive values) at the  
538 beginning of the recording (5-10 min after whole-cell configuration establishment) to the relative  
539 frequency after the block of autaptic currents by BAPTA (~20 min after whole-cell configuration  
540 establishment).

541

### 542 *Firing properties of layer 5 PV cells during photo-induced $\gamma$ -activity*

543           Bursts of  $\gamma$  activity were evoked by light stimulation of ChR2-positive PN cell bodies in Layer  
544 II/III. While recording from a layer 5 PV interneuron, a simultaneous recording of a Layer II/III ChR2-  
545 negative PN was used to determine the period of the  $\gamma$  activity. Rhythmic synaptic events evoked by  
546 light stimulation were detected using *Detector* (courtesy of J.R. Huguenard) as described above for  
547 mIPSCs. Spikes of Layer V PV cells were extracted using a threshold of -10 mV on the membrane  
548 potential trace. PSC cycles were measured and the timing of each spike in the PV neuron was  
549 expressed as a phase relative to the peak of each  $\gamma$  oscillation. Inter-spike intervals (ISI) and phase  
550 distributions were computed for each cell using custom written software (MATLAB). Variability of  
551 firing was evaluated using the entropy of the log interval distribution (Bhumbra and Dyball, 2004,  
552 2010), whereas the dispersion of peri-cycle spike times was quantified using the entropy of the  
553 corresponding phase distribution (Bhumbra and Dyball, 2010).  
554 The Circular statistic toolbox of MATLAB was used to compute parameters of phase distributions and  
555 their associated statistical tests, as indicated in the text.

556  
557 *Afterhyperpolarization (AHP) duration of single action potentials* was measured as the 10-90% decay  
558 time setting the baseline right before the spike (5 ms window). Hence, isolated spikes were selected  
559 for this analysis since the decay time of action potential being part of doublets or burst could be  
560 contaminated by the generation of the following one. The average value of the AHP decay time of 10-  
561 20 spikes was considered for each PV cell.

#### 562 *Statistics*

563 Since most data distributions were not normal, unless indicated in the text, we used non-parametric  
564 significance test, Wilcoxon's signed-rank test and Wilcoxon's rank-sum test for paired and unpaired  
565 data respectively.

566

#### 567 **Author Contributions**

568 CD and AB conceived the project; CD performed all the recordings and analyzed the data; GSB and MB  
569 designed and performed the quantal analysis; GSB, MB, AP designed and performed the analysis on  
570  $\gamma$ -oscillations; CD, CM and AA performed *in utero* electroporations; CD, GSB, MB and AB wrote the  
571 paper; MB and AB supervised the project.

572

## 573 **Acknowledgments**

574 We thank Frédéric Manseau, Pasqualina Farisello and Tommaso Fellin for their initial involvement in  
575 this project and Geeske M. van Woerden for help with *in utero* electroporation. We are grateful to  
576 Joana Lourenço, Javier Zorrilla de San Martin, Nelson Rebola and David DiGregorio for critically reading  
577 this manuscript. This work was supported by European Research Council (ERC) under the European  
578 Community's 7th Framework Programme (FP7/2007-2013)/ERC grant agreement No 200808);  
579 "Investissements d'avenir" ANR-10-IAIHU-06; Agence Nationale de la Recherche (ANR-13-BSV4-0015-  
580 01, ANR-FRONTÉLS and ANR-NanoSynDiv), Fondation Recherche Médicale (Equipe FRM  
581 DEQ20150331684), NARSAD independent investigator grant, and a grant from the Institut du Cerveau  
582 et de la Moelle épinière (Paris) (A.B.) and by a Leverhulme Trust Research grant (RPG-2013-176) and  
583 a Biotechnology and Biological Sciences Research Council Grant (BB/L001454) to M.B.

584

## 585 **Supplemental Information**

586 **Supplemental Figure 1: Detection of global inhibition onto PV cells induced by ambient**  
587 **depolarization by high extracellular  $K^+$ .**

588 Global inhibition onto single PV cells was estimated as the increase of mIPSC frequency evoked by a  
589 local puff of 20 mM KCl, triggering massive  $Ca^{2+}$ -dependent release of GABA onto the recorded neuron  
590 (Fig. 4). Shown is a snapshot of the mIPSC detection software before (left) and after (right) the high  
591 KCl puff, illustrating the ability of detecting high-frequency synaptic events in response to ambient

592 depolarization. Events were detected based on a threshold-crossing algorithm on the derivative  
593 (bottom) of the current traces (top). Vertical lines indicate detected synaptic events.

594

## 595 **References**

596 Adesnik,H., and Scanziani,M. (2010). Lateral competition for cortical space by layer-specific horizontal  
597 circuits. *Nature* *464*, 1155-1160.

598 Allene,C., Lourenco,J., and Bacci,A. (2015). The neuronal identity bias behind neocortical GABAergic  
599 plasticity. *Trends Neurosci.* *38*, 524-534.

600 Atallah,B.V., Bruns,W., Carandini,M., and Scanziani,M. (2012). Parvalbumin-expressing interneurons  
601 linearly transform cortical responses to visual stimuli. *Neuron* *73*, 159-170.

602 Avermann,M., Tomm,C., Mateo,C., Gerstner,W., and Petersen,C.C. (2012). Microcircuits of excitatory  
603 and inhibitory neurons in layer 2/3 of mouse barrel cortex. *J. Neurophysiol.* *107*, 3116-3134.

604 Bacci,A., and Huguenard,J.R. (2006). Enhancement of spike-timing precision by autaptic transmission  
605 in neocortical inhibitory interneurons. *Neuron* *49*, 119-130.

606 Bacci,A., Huguenard,J.R., and Prince,D.A. (2003). Functional autaptic neurotransmission in fast-spiking  
607 interneurons: a novel form of feedback inhibition in the neocortex. *J. Neurosci.* *23*, 859-866.

608 Bartos,M., Vida,I., and Jonas,P. (2007). Synaptic mechanisms of synchronized gamma oscillations in  
609 inhibitory interneuron networks. *Nat. Rev. Neurosci.* *8*, 45-56.

610 Bhumbra,G.S., Bannatyne,B.A., Watanabe,M., Todd,A.J., Maxwell,D.J., and Beato,M. (2014). The  
611 recurrent case for the Renshaw cell. *J. Neurosci.* *34*, 12919-12932.

612 Bhumbra,G.S., and Beato,M. (2013). Reliable evaluation of the quantal determinants of synaptic  
613 efficacy using Bayesian analysis. *J. Neurophysiol.* *109*, 603-620.

614 Bhumbra,G.S., and Dyball,R.E.J. (2004). Measuring spike coding in the rat supraoptic nucleus. *J.*  
615 *Physiol.* *555*, 281-296.

616 Bhumbra,G.S., and Dyball,R.E.J. (2010). Reading between the spikes of the hypothalamic neural code.  
617 *J. Neuroendocrinol.* *555*, 1239-1250.

618 Bodor,A.L., Katona,I., Nyiri,G., Mackie,K., Ledent,C., Hajos,N., and Freund,T.F. (2005).  
619 Endocannabinoid signaling in rat somatosensory cortex: laminar differences and involvement of  
620 specific interneuron types. *J. Neurosci* *25*, 6845-6856.

621 Buzsaki,G., and Silva,F.L. (2012). High frequency oscillations in the intact brain. *Prog. Neurobiol.* *98*,  
622 241-249.

623 Buzsaki,G., and Wang,X.J. (2012). Mechanisms of gamma oscillations. *Annu. Rev. Neurosci.* *35*, 203-  
624 225.

- 625 Cardin,J.A., Carlen,M., Meletis,K., Knoblich,U., Zhang,F., Deisseroth,K., Tsai,L.H., and Moore,C.I.  
626 (2009). Driving fast-spiking cells induces gamma rhythm and controls sensory responses. *Nature* 459,  
627 663-667.
- 628 Collin,T., Chat,M., Lucas,M.G., Moreno,H., Racay,P., Schwaller,B., Marty,A., and Llano,I. (2005).  
629 Developmental changes in parvalbumin regulate presynaptic Ca<sup>2+</sup> signaling. *J. Neurosci.* 25, 96-107.
- 630 Connelly,W.M., and Lees,G. (2010). Modulation and function of the autaptic connections of layer V  
631 fast spiking interneurons in the rat neocortex. *J. Physiol* 588, 2047-2063.
- 632 Deleuze,C., Pazienti,A., and Bacci,A. (2014). Autaptic self-inhibition of cortical GABAergic neurons:  
633 Synaptic narcissism or useful introspection? *Curr. Opin. Neurobiol.* 26C, 64-71.
- 634 Freund,T.F., and Katona,I. (2007). Perisomatic inhibition. *Neuron* 56, 33-42.
- 635 Fritschy,J.M., Panzanelli,P., and Tyagarajan,S.K. (2012). Molecular and functional heterogeneity of  
636 GABAergic synapses. *Cell Mol. Life Sci.* 69, 2485-2499.
- 637 Gulyas,A.I., Hajos,N., and Freund,T.F. (1996). Interneurons containing calretinin are specialized to  
638 control other interneurons in the rat hippocampus. *J. Neurosci.* 16, 3397-3411.
- 639 Hakim,R., Shamardani,K., and Adesnik,H. (2018). A neural circuit for gamma-band coherence across  
640 the retinotopic map in mouse visual cortex. *Elife.* 7.
- 641 Harris,K.D., and Shepherd,G.M. (2015). The neocortical circuit: themes and variations. *Nat. Neurosci.*  
642 18, 170-181.
- 643 Isaacson,J.S., and Scanziani,M. (2011). How inhibition shapes cortical activity. *Neuron* 72, 231-243.
- 644 Jiang,M., Yang,M., Yin,L., Zhang,X., and Shu,Y. (2013). Developmental Reduction of Asynchronous  
645 GABA Release from Neocortical Fast-Spiking Neurons. *Cereb. Cortex.*
- 646 Jiang,M., Zhu,J., Liu,Y., Yang,M., Tian,C., Jiang,S., Wang,Y., Guo,H., Wang,K., and Shu,Y. (2012).  
647 Enhancement of asynchronous release from fast-spiking interneuron in human and rat epileptic  
648 neocortex. *PLoS. Biol.* 10, e1001324.
- 649 Kamigaki,T., and Dan,Y. (2017). Delay activity of specific prefrontal interneuron subtypes modulates  
650 memory-guided behavior. *Nat. Neurosci.* 20, 854-863.
- 651 Kepecs,A., and Fishell,G. (2014). Interneuron cell types are fit to function. *Nature* 505, 318-326.
- 652 Letzkus,J.J., Wolff,S.B., and Luthi,A. (2015). Disinhibition, a Circuit Mechanism for Associative Learning  
653 and Memory. *Neuron* 88, 264-276.
- 654 Lourenco,J., Pacioni,S., Rebola,N., van Woerden,G.M., Marinelli,S., DiGregorio,D., and Bacci,A. (2014).  
655 Non-associative Potentiation of Perisomatic Inhibition Alters the Temporal Coding of Neocortical Layer  
656 5 Pyramidal Neurons. *PLoS. Biol.* 12, e1001903.
- 657 Manent,J.B., Wang,Y., Chang,Y., Paramasivam,M., and LoTurco,J.J. (2009). Dcx reexpression reduces  
658 subcortical band heterotopia and seizure threshold in an animal model of neuronal migration disorder.  
659 *Nat. Med.* 15, 84-90.

- 660 Mann,E.O., and Paulsen,O. (2007). Role of GABAergic inhibition in hippocampal network oscillations.  
661 *Trends Neurosci.* *30*, 343-349.
- 662 Manseau,F., Marinelli,S., Mendez,P., Schwaller,B., Prince,D.A., Huguenard,J.R., and Bacci,A. (2010).  
663 Desynchronization of Neocortical Networks by Asynchronous Release of GABA at Autaptic and  
664 Synaptic Contacts from Fast-Spiking Interneurons. *PLoS. Biol.* *8*.
- 665 Moore,N.J., Bhumbra,G.S., Foster,J.D., and Beato,M. (2015). Synaptic Connectivity between Renshaw  
666 Cells and Motoneurons in the Recurrent Inhibitory Circuit of the Spinal Cord. *J. Neurosci.* *35*, 13673-  
667 13686.
- 668 Pawelzik,H., Hughes,D.I., and Thomson,A.M. (2003). Modulation of inhibitory autapses and synapses  
669 on rat CA1 interneurons by GABA(A) receptor ligands. *J. Physiol* *546*, 701-716.
- 670 Perrenoud,Q., Pennartz,C.M., and Gentet,L.J. (2016). Membrane Potential Dynamics of Spontaneous  
671 and Visually Evoked Gamma Activity in V1 of Awake Mice. *PLoS. Biol.* *14*, e1002383.
- 672 Petreanu,L., Huber,D., Sobczyk,A., and Svoboda,K. (2007). Channelrhodopsin-2-assisted circuit  
673 mapping of long-range callosal projections. *Nat. Neurosci.* *10*, 663-668.
- 674 Pfeffer,C.K., Xue,M., He,M., Huang,Z.J., and Scanziani,M. (2013). Inhibition of inhibition in visual  
675 cortex: the logic of connections between molecularly distinct interneurons. *Nat. Neurosci.* *16*, 1068-  
676 1076.
- 677 Pi,H.J., Hangya,B., Kvitsiani,D., Sanders,J.I., Huang,Z.J., and Kepecs,A. (2013). Cortical interneurons  
678 that specialize in disinhibitory control. *Nature*.
- 679 Reyes,A., Lujan,R., Rozov,A., Burnashev,N., Somogyi,P., and Sakmann,B. (1998). Target-cell-specific  
680 facilitation and depression in neocortical circuits. *1*, 279-285.
- 681 Sah,P., and Faber,E.S. (2002). Channels underlying neuronal calcium-activated potassium currents.  
682 *Prog. Neurobiol.* *66*, 345-353.
- 683 Shao,Y.R., Isett,B.R., Miyashita,T., Chung,J., Pourzia,O., Gasperini,R.J., and Feldman,D.E. (2013).  
684 Plasticity of recurrent I2/3 inhibition and gamma oscillations by whisker experience. *Neuron* *80*, 210-  
685 222.
- 686 Silver,R.A. (2003). Estimation of nonuniform quantal parameters with multiple-probability fluctuation  
687 analysis: theory, application and limitations. *J. Neurosci. Methods* *130*, 127-141.
- 688 Sohal,V.S., Zhang,F., Yizhar,O., and Deisseroth,K. (2009). Parvalbumin neurons and gamma rhythms  
689 enhance cortical circuit performance. *Nature* *459*, 698-702.
- 690 Tamas,G., Buhl,E.H., and Somogyi,P. (1997). Massive autaptic self-innervation of GABAergic neurons  
691 in cat visual cortex. *J. Neurosci.* *17*, 6352-6364.
- 692 Tremblay,R., Lee,S., and Rudy,B. (2016). GABAergic Interneurons in the Neocortex: From Cellular  
693 Properties to Circuits. *Neuron* *91*, 260-292.
- 694 Van der Loos,H., and Glaser,E.M. (1972). Autapses in neocortex cerebri: synapses between a pyramidal  
695 cell's axon and its own dendrites. *Brain Res.* *48*, 355-360.



696 Xue,M., Atallah,B.V., and Scanziani,M. (2014). Equalizing excitation-inhibition ratios across visual  
697 cortical neurons. *Nature* 511, 596-600.  
698

699 Table 1: Mean current in all PV-PN and PV-PV pairs

|                      | All data                |
|----------------------|-------------------------|
| PV autaptic IPSCs    | 451.82 ± 43.14 pA; n=84 |
| PV-PN synaptic IPSCs | 146.87 ± 20.89 pA; n=22 |
| PV-PV synaptic IPSCs | 246.11 ± 36.15 pA; n=49 |

700

701

702

703 Table 2: Mean current in PV-PN and PV-PV pairs with both autaptic and synaptic connections

|             | Dual connections only |                      |
|-------------|-----------------------|----------------------|
|             | autaptic IPSCs        | synaptic IPSCs       |
| PV-PN pairs | 417.50 ± 58.10; n=16  | 124.32 ± 21.92; n=16 |
| PV-PV pairs | 469.99 ± 62.48; n=38  | 266.59 ± 44.44; n=38 |

704

705

706

707 Table 3: Bayesian quantal analysis in PV-PN pairs with both autaptic and synaptic connections

|                            | autaptic IPSCs (n=11) | synaptic IPSCs (n=11) |
|----------------------------|-----------------------|-----------------------|
| Quantal size (q)           | 31.17 ± 4.28 pA       | 16.68 ± 2.71 pA       |
| Number of release site (n) | 18.70 ± 2.76          | 16.26 ± 2.70          |
| Probability of release (p) | 0.77 ± 0.03           | 0.64 ± 0.05           |
| Max current (r)            | 513.65 ± 74.82 pA     | 245.33 ± 39.88 pA     |

708

709

710

711

712 Table 4: Bayesian quantal analysis in PV-PV pairs with both autaptic and synaptic connections

|                            | autIPSCs > synIPSCs (n=9) |                   | autIPSCs < synIPSCs (n=6) |                    |
|----------------------------|---------------------------|-------------------|---------------------------|--------------------|
|                            | autaptic IPSCs            | synaptic IPSCs    | autaptic IPSCs            | synaptic IPSCs     |
| Quantal size (q)           | 42.54 ± 10.10 pA          | 23.82 ± 4.60 pA   | 24.47 ± 4.32 pA           | 26.36 ± 5.18 pA    |
| Number of release site (n) | 24.34 ± 3.29              | 13.03 ± 5.52      | 16.75 ± 2.51              | 40.18 ± 8.02       |
| Probability of release (p) | 0.80 ± 0.02               | 0.75 ± 0.05       | 0.75 ± 0.05               | 0.58 ± 0.06        |
| Max current (r)            | 927.72 ± 198.28 pA        | 222.01 ± 54.94 pA | 393.30 ± 78.53 pA         | 900.61 ± 153.58 pA |

713

714

715

## Supplemental Information

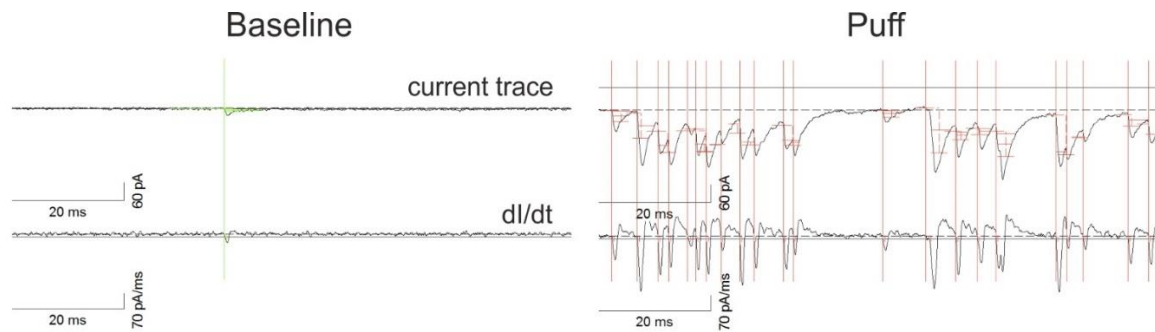

### Supplemental Figure 1: Detection of global inhibition onto PV cells induced by ambient depolarization by high extracellular K<sup>+</sup>.

Global inhibition onto single PV cells was estimated as the increase of mIPSC frequency evoked by a local puff of 20 mM KCl, triggering massive Ca<sup>2+</sup>-dependent release of GABA onto the recorded neuron (Fig. 4). Shown is a snapshot of the mIPSC detection software before (left) and after (right) the high KCl puff, illustrating the ability of detecting high-frequency synaptic events in response to ambient depolarization. Events were detected based on a threshold-crossing algorithm on the derivative (bottom) of the current traces (top). Vertical lines indicate detected synaptic events.
